1 **Neuropeptidergic regulation of Compulsive Ethanol Seeking in *C. elegans***

2

3

4 Authors: Chinnu Salim, Ann Ke Kan, E. Clare Patterson and Changhoon Jee\*

5

6 Dept. of Pharmacology, Addiction Science and Toxicology, University of Tennessee Health

7 Science Center, 71 S Manassas St., Memphis, TN

8

9 \*To whom correspondence should be addressed.

10 Changhoon Jee, Ph.D

11 Dept. of Pharmacology, Addiction Science and Toxicology

12 College of Medicine, UTHSC

13 71 S. Manassas St., Suite 217

14 Memphis, TN, 38103

15 Tel) 901-448-6050

16 Fax)901-448-1623

17 [cjee1@uthsc.edu](mailto:cjee1@uthsc.edu)

18

19 Running title: Compulsive Ethanol Seeking

20 Key Words: Ethanol, Preference, Compulsion, SEB-3, TKR-1, *C. elegans*, CRF<sub>1</sub> receptor,

21 Neurokinin receptor

22

23

1           **Abstract**

2           An improved understanding of the molecular basis of alcohol seeking despite the  
3 catastrophic consequences of alcohol abuse is likely to enrich our treatments for Alcohol Use  
4 Disorders (AUD) and comorbidities. The compulsive seeking is characterized by an imbalance  
5 between the superior drive to substance and disruption in control of substance use. To model the  
6 development of compulsive engagement of alcohol seeking, we exploit two distinct behavioral  
7 programs of *C. elegans* in conflict, ethanol preference and avoidance of aversive stimulus,  
8 simultaneously. We demonstrate that *C. elegans* exhibited the recapitulation of the pivotal features  
9 of compulsive alcohol seeking in mammals, which are repeated attempts, endurance, and finally  
10 aversion-resistant ethanol seeking. We find that the neuropeptide signaling via SEB-3, CRF  
11 receptor-like GPCR, facilitates the development of ethanol preference and compels animals to seek  
12 ethanol compulsively. Furthermore, our functional genomic approach and behavioral elucidation  
13 suggest the interaction between neuropeptidergic signaling, SEB-3 and TKR-1, Neurokinin  
14 receptor orthologue, to progress compulsive ethanol seeking behavior.

15

16

17

18

19

20

21

22

## 1           **Introduction**

2           Alcohol Use Disorder (AUD) is a chronic neurobehavioral disorder. A chronic exposure  
3           leads to the development of tolerance contributing to increased consumption (<sup>1, 2, 3</sup>). Subsequently,  
4           during the withdrawal or abstinence, alcohol craving and seeking are reinstated (<sup>4, 5, 6</sup>). Since these  
5           three phases model has provided a inferred understanding of the development of AUD (<sup>7</sup>),  
6           development of preference and compulsive seeking, known to be involved in progress of alcohol  
7           dependence, have been identified as a pivotal and defining characteristic of AUD and other  
8           substance use disorders (<sup>8, 9, 10</sup>). Furthermore, recent Human genome-wide association study  
9           (GWAS) demonstrate that heavy drinking and increased consumption are not sufficient causes of  
10          AUD, although binge drinking and increased consumption are key risk factors for AUD (<sup>11</sup>).  
11          Hence, the neural substrates underlying compulsive seeking despite catastrophic consequences are  
12          crucial components of AUD and comorbidities, but the molecular mechanism remains largely  
13          elusive. The compulsive seeking in AUD is characterized by an imbalance between superior drive  
14          to alcohol and disruption in control of alcohol use (<sup>12, 13</sup>). In order to model this highly complex  
15          neuromodulation, we addressed sophisticated behavioral paradigms in the simplest and most  
16          completely defined connectome with the advantage of the straightforward genetic, behavioral, and  
17          neurophysiological investigation, *C. elegans* (<sup>14, 15, 16</sup>). In a comparative proteomics study, 83%  
18          of the worm proteome was found to have human homologous genes and recent meta-analysis of  
19          orthology-prediction methods, about 52.6% of human protein-coding genome has recognizable  
20          worm orthologues (<sup>17, 18</sup>), allow the worm a suitable model organism for functional validation of  
21          human genes.

22          *C. elegans* also has been shown to be a powerful and a deployable genetic tool to study  
23          AUD (<sup>19, 20, 21, 22, 23, 24, 25</sup>). Worms showed comparable physiological effects in similar human

1 blood alcohol levels and develop acute functional tolerance in the presence of ethanol. Remarkably,  
2 worms also develop ethanol withdrawal symptom of tremor, which is reduced and abolished by  
3 replenishment of ethanol (<sup>22</sup>). Previously, we have demonstrated and characterized a form of  
4 ethanol-preference behavior. Ethanol preference is elicited by prolonged exposure to ethanol in *C.*  
5 *elegans*, like mammals (<sup>22</sup>). In this study, we further characterized the ethanol preference and  
6 demonstrated that *C. elegans* progresses compulsive ethanol seeking behavior. To evaluate the  
7 compulsive seeking, the repetitive/obsessive aspects and aversion-resistant seeking scale were  
8 applied, which has been used in human genetic studies for reliable assessing alcohol craving and  
9 dependence (<sup>6, 26, 27</sup>). Subsequently, we discovered that *seb-3* (Secretin family Class B GPCR), a  
10 corticotropin-releasing factor (CRF) receptor-like GPCR in *C. elegans*, facilitates the development  
11 of ethanol preference and progress to compulsive ethanol seeking behavior. A CRF receptor has  
12 long been known to have roles in brain stress response and been implicated in the pathophysiology  
13 of anxiety and AUD (<sup>28, 29, 30, 31</sup>). Additionally, its function has been implicated in compulsive  
14 drug self-administration and stress-induced reinstatement of drug seeking in mammalian studies  
15 (<sup>32</sup>). Furthermore, a recent GWAS identified CRFR1 loci is associated with habitual alcohol intake  
16 (<sup>33</sup>). We have analyzed differentially expressed genes in a gain-of-function variant of *seb-3*, that  
17 facilitates faster development of preference and enhances compulsive seeking of ethanol. Here, we  
18 suggest TKR-1, neurokinin receptor orthologue, is upregulated by potentiation of SEB-3 to  
19 progress maladaptive compulsive ethanol seeking affecting susceptibility to AUD.

20

## 21 **Materials and Methods**

22 All strains were maintained on nematode growth media (NGM) plates with *Escherichia*  
23 *coli* (OP50) at 20°C (<sup>34</sup>) and the hermaphrodite was used for behavioral analysis. The wild-type

1 animals used for the experiment were the Bristol N2 strain. The strains *tkr-1(ok2886)*, *tkr-2*  
2 (*ok1620*) and *tkr-3(ok381)* were obtained from Caenorhabditis Genetics Center (CGC,  
3 Minneapolis, MN, USA), which is supported by the National Institutes of Health - Office of  
4 Research Infrastructure Programs (P40 OD010440). *seb-3(eg696)gf* previously isolated from a  
5 genetic screening and the *seb-3(tm1848)lf* strain was obtained from S. Mitani (Tokyo Women's  
6 Medical University, Tokyo, Japan) and backcrossed twice with N2 (<sup>22</sup>).

### 7 **Trajectory Analysis of *C.elegans* locomotion in the development of ethanol preference**

8 NGM was added to each well of 4 well tissue culture dish (1.9 cm<sup>2</sup>) to fill all the wells  
9 equally to the top. Outside of well also filled up with NGM and the boundary were slightly covered  
10 by disruption of surface tension when NGM was not solidified, which contained a gradient of  
11 ethanol but an allowance of free moving of worms on the surface. Out of the 4 wells, one well was  
12 selected and the glass Pasteur pipette (2ml volume) punctured to make a hole for adding ethanol  
13 up to 300Mm. The plate was sealed with parafilm after adding ethanol then 1 hour later used. 1day  
14 adult animals were washed twice in S-basal (100mM NaCl, 50mM potassium phosphate (pH 6.0),  
15 <sup>35</sup>) and once in distilled water. After a final wash, 10 worms (Naïve or Ethanol treated) were  
16 introduced to the mid-region of 4-well plate by gentle picking with a platinum wire. Seal with  
17 parafilm and recorded the locomotion for 30 minutes in Wormlab (MBF Bioscience). The  
18 trajectory and time spent in the distinct area were analyzed by Wormlab software (MBF  
19 Bioscience). For the control speed and travel distance, 10 Naïve or Ethanol treated animals were  
20 placed on NGM plate with OP50 lawn (food) then 15 min locomotion was recorded and analyzed  
21 with Wormlab (MBF Bioscience).

### 22 **Aversion-resistant Ethanol seeking Assay**

1           The ethanol pre-exposure plates were prepared as previously described (<sup>19, 21</sup>). Preexposure  
2 plates were 6-cm NGM plates that had been seeded with bacteria on half of the plate and were  
3 dried for 2 h. Ice-cold ethanol was added up to final concentration of 300 mM ethanol (from our  
4 previous publication; <sup>21</sup>) and worms were introduced to ethanol plates for 4 hours pre-exposure  
5 with parafilm sealing. Briefly, well-fed naïve or ethanol pretreated animals (300mM) were washed  
6 twice with S-buffer [100mM NaCl, 50mM potassium phosphate (pH 6.0)] and once in distilled  
7 water. Then animals were placed on mark above B (arrow in fig. 2) at the chemotaxis assay plate  
8 (<sup>36, 37</sup>). Animals were allowed to move freely on an assay plate with different concentrations of  
9 CuSO<sub>4</sub> barrier to see the compulsive alcohol seeking behavior. The concentration of copper barrier  
10 was taken from the previous publication of Hilliard et al, 2004 (<sup>38</sup>), starting from a lower  
11 concentration of 2 mM to 20 mM. Before making the chemical barrier, allow the chemotaxis plates  
12 to dry for 1 hr. To make a chemical barrier, pre-cut (3mm thickness) Whatman filter paper (cat  
13 No-3030-335) was placed at the center of the 100 mm chemotaxis assay plate dividing the plate  
14 into two equal halves across the midline, as marked aversive barrier in (fig. 2). A 100 µl of CuSO<sub>4</sub>  
15 (each concentration; 2 to 20mM) was added to this filter paper barrier as per the experiment, from  
16 one edge to the other end. Briefly after adding CuSO<sub>4</sub> solution, the filter paper was gently removed  
17 using forceps. Meanwhile, 1 µl of 1M NaN<sub>3</sub> was added to the point marked A (fig. 2) and 30 µl  
18 of ethanol (200 proof) on top of it. Immediately after the chemical compound was absorbed into  
19 the 10cm chemotaxis plate, about 100 to 150 washed animals were placed in the area marked in B  
20 section using glassware micropipette. The excess liquid was removed with a Kimwipe for animals  
21 not to be clumped at the origin. 40 minutes later with parafilm sealing, the number of animals in  
22 each section marked (Fig.2; A, B, C and D) was counted to calculate the Seeking index. The index  
23 was calculated by [(number of animals in A - number of animals in B)/Total number of animals

1 [Seeking index  $SI = (A-B)/\text{Total}(A+B+C+D)$ ]. To measure the copper sensitivity, 20 naïve or  
2 Ethanol-pretreated animals were placed on the aversion-resistant assay plate with 5mM  $\text{CuSO}_4$   
3 barrier then the locomotion was recorded for 30min. Time to respond to the copper barrier, which  
4 was stopping forward locomotion and backward then turn to avoid it, was measured in each  
5 animal's first encounter with the copper barrier. To assess with different types of aversive stimuli  
6 than copper, 5mM or 10mM Denatonium benzoate was applied to the assay plate in the same way  
7 to create an aversive barrier. SI in each trial was obtained from the population assay of 100 to 150  
8 animals. Avoidance assay with drop test (0.1mM, 1mM, and 5mM  $\text{CuSO}_4$ ) was conducted as  
9 shown in previous study (<sup>39, 38</sup>), to measure the sensitivity to nociceptive stimuli of WT and *seb-*  
10 *3(eg696)* gf animals. Single L4 worms were transferred to each NGM plate with abundant OP50,  
11 and 15 h later the assay was conducted. Assays were conducted under blind conditions and were  
12 not performed more than once on any individual animal. The avoidance index (AI) in (b) is the  
13 number of positive responses divided by the total number of trials. Mean latency to respond was  
14 calculated for all positive responses.

## 15 **Sequence alignment**

16 TKR-1 protein sequences (NP\_499064.2) were analyzed by database similarity search (<sup>40</sup>) and the  
17 multiple protein sequences were simultaneously aligned using the COBALT, a constraint based  
18 alignment tool (<sup>41</sup>). The transmembrane helix domains were predicted using the conserved domain  
19 database (CDD) (<sup>42</sup>). For the phylogenetic tree analysis, Worm, human, rat, and mouse neurokinin  
20 receptor sequences used for alignment: worm TKR-1 (NP\_499064.2), h\_TACR1/NK1R  
21 (NP\_001049.1), h\_TACR2/NK2R (NP\_001048.2), h\_TACR3/NK3R (NP\_001050.1),  
22 r\_TACR1/NK1R (NP\_036799.1), r\_TACR2/NK2R (NP\_542946.1), r\_TACR3/NK3R  
23 (NP\_058749.1), m\_TACR1/NK1R (XP\_006505926.1), m\_TACR2/NK2R (NP\_067357.1), and  
24 m\_TACR3/NK3R (NP\_033340.3). The phylogenetic tree was constructed by COBALT using  
25 minimum evolution method.

## 26 **Statistical Analysis**

1           The Mean and standard error of the mean (SEM) were determined for all experimental  
2 parameters. The data were analyzed employing the Chi-square test or Mann-Whitney test (Graph  
3 pad prism version 8.0.1). Values below 0.05 were considered as significant.

#### 4 **Microarray Analysis**

5           Isolation of nucleic acid and microarray followed by analysis of differentially expressed  
6 gene profiling was done in Molecular Recourse center of excellence (MRC), UTHSC. Briefly,  
7 synchronized 1 day adult population of WT and *seb-3gf(eg696)* where used for total RNA isolation.  
8 Approximately 10 one day adult animals where allowed to lay eggs per 15 NGM plates seeded  
9 with OP 50 for 8 to 10 hours. After 10 hours, the adult animals were removed and embryo where  
10 allowed to grow at 20 degree. After 72 hours, one-day adult animals from each plate were washed  
11 out with M9 buffer and washed the worms three times before collected in 1.5ul nuclease free sterile  
12 Eppendorf tubes and stored at -80 with RNA later until use. Isolation of nucleic acid (total RNA)  
13 was done in Qi cube unit using Qiagen RNeasy mini kit according to manufacturer's instruction  
14 and standard protocol. Quantification of nucleic acid was done by Agilent2100 bioanalyzer,  
15 nanodrop and qubit. Individual sample (*n*-3) was run for Affymetrix microarray focusing on  
16 individual response. Analysis was done using Affymetrix Genotyping Console and Affymetrix  
17 Transcriptome Analysis Console software.

18           For the population of germ cell production inhibited, 5'-fluorodeoxyuridine (FUdR) was  
19 treated from late L4 till the collection for the RNA preparation. The total RNA was isolated from  
20 3 replicates of synchronized 1-day adult population of WT, *seb-3gf(eg696)*, FUdR-treated WT,  
21 and FUdR-treated *seb-3gf(eg696)*, respectively. Since FUdR affects some physiological function  
22 such as osmotic stress related life span extension (<sup>43</sup>), gene expression profiling from germ cell  
23 production inhibited was verified by excluding overlapping hits through cross-validation through



1 mutual comparison. 1 candidate gene that changed in meaningful direction and amount by FUdR  
2 treatment was removed from the final differentially expressed genes candidates. RNA was reverse  
3 transcribed and labeled using GeneChip™ Whole Transcript (WT) Pico kit and hybridized to  
4 GeneChip™ C. elegans Gene 1.0 ST Array (Thermo Fisher Scientific) for whole-genome  
5 expression profiling.

6 Text files were retrieved from UTHSC Molecular Resource Center after normalization  
7 performed by Affymetrix Expression Condole. Quality assurance was checked against reference  
8 probes to ensure quality of data. Gene names, accession numbers, and expression were mined from  
9 each text file for each sample. All non-annotated information was removed from the file leaving  
10 only annotated gene expression. A student *t* test was run for pairwise interactions in order to obtain  
11 pvalues for significance. Only genes with a pvalue < 0.05 were considered significant. The mean,  
12 variance, standard deviation, and fold change were calculated for each pairwise comparison.  
13 Benjamini Hochberg false discovery rate method was applied in order to obtain the adjusted pvalue  
14 for each gene (<sup>44</sup>). Heatmaps were created to visualize the expression of the significant genes of  
15 each pairwise comparison. Only genes with a p value < 0.05 were considered significant (<sup>44</sup>). Gene  
16 ontology enrichment analysis was conducted in the GO resource (GO; <http://geneontology.org>)  
17 and WormBase (<https://wormbase.org/tools/enrichment/tea/tea.cgi>) and verified through cross-  
18 validation through mutual comparison (<sup>45, 46, 47, 48, 49</sup>). Additionally, a comprehensive comparison  
19 of the results performed in Tissue Enrichment Analysis (TEA), Phenotype Enrichment Analysis  
20 (PEA) provided by WormBase was used to investigate genes predicted them to function in the  
21 same cellular pathway for further functional evaluation (<sup>48, 49</sup>).

22

23

## 1 **Results**

2           An ethanol preexposure elicits ethanol preference in wild-type (WT) *C. elegans* animals.  
3 Previous quadrant-plate assay successfully quantified that Ethanol pretreated animals  
4 preferentially accumulated in the ethanol area for 30 minutes of permission to move freely,  
5 whereas naïve animals accumulated more in the non-ethanol area at first experience<sup>(21)</sup>. Here, we  
6 further investigated the comprehensive response of *C. elegans* to the ethanol including initial  
7 response. WT animals were allowed to move freely on the assay plate, which contains ethanol in  
8 only one of the 4 well (1.9 cm<sup>2</sup>) of the culture dish (Fig.1) and recorded locomotion of animals  
9 were analyzed. The ethanol concentration was determined based on the behavioral and  
10 physiological response to various concentrations shown in previous studies<sup>(19, 20, 21)</sup>. It has been  
11 shown that the internal concentration of ethanol for WT animals, which were exposed and forced  
12 to be in 400mM ethanol plate, were comparable with 0.1% blood alcohol in human, corresponds  
13 to 21.7 mM ethanol in the blood<sup>(19, 20)</sup>. We treated and tested animals in 300mM ethanol, which  
14 was shown to induce ethanol preference of WT animals within 4 hours while being rapidly sobered  
15 from intoxication when treated chronically<sup>(21)</sup>. The trajectory, exploring patterns, of an individual  
16 animal exhibited a distinct difference of response to ethanol between naïve and pretreated animals  
17 (Fig. 1). Naïve animals kept exploring the area with and without ethanol when the animal is  
18 introduced to the assay plate which is only one of the four wells contains ethanol. When animals  
19 first encountered ethanol and moved in the ethanol area, the speed of locomotion was reduced  
20 which was corresponding to the behavioral characteristic of intoxication. Then, they left the  
21 ethanol zone and kept moving, exploring in the non-ethanol zone more time (Fig. 1a and Fig. 1c;  
22 0% appearance in the ethanol area of the assay plate for some of the naïve animals such as #4, #5).  
23 In contrast, ethanol-pretreated WT animals headed straight to the ethanol zone and stayed in the

1 ethanol zone (Fig. 1b and Fig. 1d). The naïve animals stayed longer in the non-ethanol area (66%  
2 of time spent) whereas ethanol pretreated animals spent 89% of the time in the ethanol area (Fig.  
3 1d). First, we addressed the question of whether the change of locomotion behavior is due to an  
4 inability to keep moving. Ethanol pretreated (300mM) animals were placed on the non-ethanol  
5 NGM and their locomotion was analyzed. The ability to move was not defective after ethanol  
6 pretreatment. While animals exposed to 300mM exogenous ethanol for the pretreatment (Fig.1),  
7 the speed of locomotion was reduced initially but recovered. Thus, no difficulty was observed in  
8 the movement of pretreated animals (Fig. 2a, 2b). Ethanol preexposure produces a reversible  
9 change in body bends of worm interlocked with the locomotion resulting in a progressive decrease  
10 in the speed of movement (<sup>19</sup>). Subsequently, a decrease of speed is recovered in the presence of  
11 ethanol that was shown to be corresponding to intoxication and acute functional tolerance in other  
12 systems (<sup>20</sup>). Besides, pretreated animals represented an increase of speed and travel distance upon  
13 ethanol withdrawal (Fig. 2c), comparable to behavioral stimulation induced by ethanol withdrawal  
14 in other system (<sup>50</sup>).

15 To further address the question of how preexposure to ethanol might lead animals to stay  
16 in the ethanol area although ethanol pretreated animals had an increased exploring and enhanced  
17 active behavior, we established the measurement for the motivational strength of ethanol  
18 preference progressed by ethanol pretreatment (Fig. 3a). We exploited two distinct behavioral  
19 programs in conflict, an ethanol-seeking and avoidance of aversive stimuli blocking ethanol-  
20 seeking simultaneously. The motivational strength for the ethanol was indexed by exposing the  
21 animals to the ethanol and aversive stimuli at the same time after the pretreatment of ethanol. The  
22 nociceptive stimuli of Cu<sup>2+</sup> set up as an aversive barrier to interfere with chemotaxis to ethanol  
23 (Fig. 3a, 3b, and 3c). *C. elegans* makes use of polymodal sensory neurons to detect a wide range

1 of aversive and painful stimuli including water soluble chemical repellents such as quinine,  
2 denatonium benzoate, and  $\text{Cu}^{2+}$  (39, 38) and to let them to avoid it. An animal who detects the  
3 aversive stimulus stop its forward locomotion and turn away from the source of stimulus resulting  
4 in avoidance. Increased attempt to cross over and endurance of seeking ethanol was observed in  
5 the pretreated animals (Fig. 3a). Average trials of single animal (counted out of 103 worms) for  
6 5minutes was 0.56 in naïve whereas 2.28 in pretreated (counted out of 80 worms). These repeated  
7 trials of pretreated animals resulted in crossing over the chemical barrier and heading to the ethanol  
8 area. The 23.08 % of the trials in pretreated animals resulted in successful crossing to seek ethanol  
9 whereas only 3.45 % of the trials in naïve animals. These repetitive attempting and crossing over  
10 the aversive barrier were hypothesized to be proportional to motivational compulsion to seek  
11 ethanol since ethanol pretreatment does not interfere with the ability of worms to detect  $\text{Cu}^{2+}$   
12 barrier. The sensitivity of ethanol-pretreated animals to aversive stimuli was not altered (Fig. 3b).  
13 Subsequently, we quantified the animals successfully reached to ethanol over aversive  $\text{Cu}^{2+}$  barrier  
14 in time and Seeking Index (SI) was obtained as shown in (Fig. 3a). We tested what range of  $\text{Cu}^{2+}$   
15 concentration naïve or pretreated WT animals could cross over to reach the ethanol area. The drive  
16 of pretreated animals to seek ethanol superseded its aversive  $\text{Cu}^{2+}$  response in a concentration-  
17 dependent manner (Fig. 3c). The ethanol preference developed by pretreatment enabled WT  
18 animals to cross the  $\text{Cu}^{2+}$  barrier in low concentration (2mM, 5mM), aversive stimuli that Naïve  
19 animal does not cross. However, while going from lower concentration to higher concentration of  
20 barrier (10mM, 20mM), ethanol pretreated animals failed to overcome the  $\text{Cu}^{2+}$  barrier. 4 hours  
21 pretreatment of ethanol was not enough to enable WT animals to cross the aversive  $\text{Cu}^{2+}$  barrier  
22 to reach the ethanol area. Evidently, this change is strengthened with longer ethanol exposures  
23 (data not shown). Then we also introduced another aversive stimulus, denatonium benzoate as a

1 barrier. Without pretreatment of ethanol, all the tested concentrations of denatonium barrier  
2 successfully block to interfere the naïve animals' chemotaxis to ethanol. However, pretreated  
3 animals showed endurance against the denatonium barrier to reach the ethanol area and crossed  
4 the low concentration of obstacle (Fig. 3d). Since the compulsivity is defined as the urge to perform  
5 and persist to take a substance that escapes control despite serious negative consequences (<sup>51, 52,</sup>  
6 <sup>53</sup>), these results suggest that aversion-resistant ethanol seeking approach can be used as a proxy  
7 measure for the compulsive ethanol seeking behavior.

8         Neuropeptide signaling orchestrates many complex behaviors in the brain, including  
9 compulsive behavior. Previously, we demonstrated the functional conservation of the neuropeptide  
10 corticotropin-releasing factor (CRF) system in responses to stress and ethanol in worms and mice  
11 (<sup>22</sup>). We reported that *seb-3*, CRF (corticotropin-releasing factor) receptor-like G protein-coupled  
12 receptor of *C. elegans* facilitated the development of acute tolerance to ethanol and ethanol  
13 withdrawal symptom (<sup>22</sup>). Since the CRF (corticotropin releasing factor) receptor function has been  
14 implicated in compulsive drug self-administration and stress-induced reinstatement of drug  
15 seeking in mammalian studies, we hypothesized *seb-3(eg696)* gain of function (gf) animals would  
16 also be able to exhibit enhanced alcohol seeking against the higher concentration of Cu<sup>2+</sup> barrier.  
17 A *seb-3(eg696)*, dominant mutation, was suggested and functionally evaluated as a gain of  
18 function mutation due to its identity of mutation, which was single amino acid change in a  
19 conserved residue at the third intracellular loop, the binding region for G proteins (<sup>22, 54, 55, 56</sup>).  
20 First, ethanol preference of *seb-3(eg696)* animals and *seb-3(tm1848)* Knockout animals due to its  
21 deletion (<sup>22</sup>) was tested in the preference assay on ethanol-containing quadrant plates (Fig. 4a).  
22 Animals were allowed to move freely for 30 minutes between two control quadrants without  
23 ethanol and two ethanol quadrants. The naïve animals of WT, *seb-3(eg696)*, and *seb-3(tm1848)*

1 accumulated on non-ethanol regions. No significant ethanol preference was observed in naïve  
2 animals of all WT, *seb-3(eg696)*, and *seb-3(tm1848)* (Fig. 4b). Remarkably, *seb-3(eg696)* gf  
3 animals represented much faster and greater ethanol preference after ethanol pretreatment.  
4 Significant ethanol preference was observed in animals pretreated with ethanol for 2 hours whereas  
5 WT animals did not (Fig. 4c). Additionally, greater development of preference was observed in  
6 *seb-3(eg696)* animals after 4 hours ethanol pretreatment. Moreover, impaired development of  
7 ethanol preference was observed in ethanol pretreated *seb-3(tm1848)* animals (Fig. 4c) suggesting  
8 SEB-3 facilitated the ethanol preference. Subsequently, we conducted aversion-resistant ethanol  
9 seeking assay with *seb-3* mutant animals. Quantification of *seb3(eg696)* gf mutant animals'  
10 motivational drive to seek ethanol showed enhanced aversion-resistant ethanol seeking behavior  
11 compared to WT animals in overall concentrations of barrier including higher concentrations  
12 (10mM and 20mM). The ethanol pretreated *seb-3(eg696)* gf animals gathered at the barrier in the  
13 middle of assay plate and the repetitive attempting led animals to cross over the aversive barrier.  
14 The pretreated *seb-3(eg696)* gf animals exhibited significantly high SI values not only in lower  
15 but also in the higher concentration of  $\text{Cu}^{2+}$  (Fig. 5a). Nevertheless, sensory perception of aversive  
16  $\text{Cu}^{2+}$  stimuli was not defective in *seb-3(eg696)* gf animals (Fig. 5b, 5c, 5d, and 5e) represented  
17 enhanced ethanol preference, which could override the interference of noxious stimuli. Although  
18 *seb-3(eg696)* gf animals are slightly more sensitive to nociceptive stimuli (<sup>22</sup>, Fig. 5c), crossed the  
19 aversive barrier for ethanol. Additionally, *seb-3(tm1848)* Knockout animals did not develop  
20 chemotaxis to ethanol after pretreatment as much as WT animals nor cross both low and high  
21 concentrations (2mM, 5mM, 10mM) of  $\text{Cu}^{2+}$  barrier for ethanol (Fig. 5f). Taken together with  
22 ethanol preference, we conclude SEB-3 also contribute to the progress of compulsive ethanol  
23 seeking.

1           Having defined the progress of the compulsive ethanol seeking, we next investigated a  
2 gene expression profile of *seb-3(eg696)* *gf* animals to identity the genes and pathways underlying  
3 the enhancement of ethanol preference and progress of compulsive ethanol seeking. The total RNA  
4 was isolated from synchronized young adult populations of which germ cell production was  
5 pharmacologically inhibited to improve the chance of identification of differentially expressed  
6 genes in somatic cells including neuronal tissue, then applied to the Affymetrix gene chip array.  
7 Microarray analysis revealed 716 transcripts that are differentially expressed in *seb-3(eg696)* *gf*  
8 animals ( $\geq 1.5X$ , Fig. 6a) compared to WT animals. Subsequent Gene Ontology (GO) enrichment  
9 analysis (See Methods) identified total 16 GO terms in upregulated and downregulated gene  
10 clusters (Fig. 6b, 6c, Sup.1, and Sup.2). The most prominent enrichment in biological processes  
11 includes the immune system process, defense response, and response to biotic stimulus, which is  
12 in line with the role of the stress response for survival and reproduction in adverse conditions.

13           Remarkably, we identified the upregulated *tkr-1* in Neuropeptide signaling pathway  
14 (GO:0007218, Fig. 6b, Sup. 2). A *tkr-1* is predicted to encode a G protein-coupled receptor  
15 (GPCR), which is a human orthologue of Tachykinin Receptor also known as neurokinin receptor  
16 (<sup>18</sup>). Tachykinins/Neurokinins and their receptors are neuropeptides signaling conserved from  
17 invertebrates to mammals (<sup>57</sup>, <sup>58</sup>). In mammals, tachykinins are widely distributed in the nervous  
18 systems and gastrointestinal tract. The three genes encoding precursors of tachykinins give rise to  
19 nine distinct tachykinins, which interact with three different receptors such as neurokinin 1  
20 receptor (NK1R), neurokinin 2 receptor (NK2R), and neurokinin 3 receptor (NK3R) (<sup>59</sup>). TKR-1  
21 shows 51% similarity with human NK1R in overall 406 amino acids and 52% similarity with  
22 human NK3R. TKR-1 represents the putative ligand-binding pocket defined according to the NMR  
23 evidence of Substance P (SP) docking to the NK1R pocket (Fig.7a , <sup>60</sup>), The crystal structure of

1 NK1R in complex with clinically used antagonist also endorse the important role of this region,  
2 that is a ligand bind deeper within the receptor core (<sup>61</sup>). Tachykinin/Neurokinin system is  
3 functionally pleiotropic and has been reported to be involved in the stress responses, anxiety, pain,  
4 inflammation, immune response, and sensory processing (<sup>59, 62, 63, 64, 65, 66, 67</sup>). For the functional  
5 evaluation of *tkr-1* in association with the ethanol preference and compulsive ethanol seeking, we  
6 tested the KO mutant of *tkr-1* (*ok2886*) in the assay for aversion-resistant ethanol seeking. The *C.*  
7 *elegans* genome includes 3 genes predicted to encode Neurokinin receptor family proteins, *tkr-1*,  
8 *tkr-2*, and *tkr-3* as shown in the phylogenetic analysis of the Tachykinin/Neurokinin Receptor  
9 family (Fig. 7b). The phylogenetic tree was constructed by COBALT (constraint-based alignment  
10 tool for multiple protein sequences) using minimum evolution method (<sup>25</sup>). We also tested KO  
11 mutant animals of *tkr-2* (*ok1620*) and *tkr-3*(*ok381*) in the neurokinin receptor family. The tested  
12 are putative KO strains due to the deletion of genomic loci (Fig. 7c, 7d, and 7e). The evident  
13 phenotype was observed in *tkr-1* (*ok2886*) animals. A Fig. 7b showed significantly low SI values  
14 of *tkr-1* KO compared to WT animals in ethanol seeking assay against the Cu<sup>2+</sup> barrier in overall  
15 concentrations. Remarkably, *tkr-1* KO animals did not cross even low concentration of Cu<sup>2+</sup> barrier  
16 after ethanol pretreatment like *seb-3* KO animals. Interestingly, the KO animals of *tkr-2*, predicted  
17 as a NK3R orthologue (<sup>18</sup>), also showed slightly reduced development of aversion-resistant ethanol  
18 seeking induced by ethanol pretreatment whereas *tkr-3* KO animals displayed ethanol preference  
19 and aversion-resistant ethanol seeking as much as wild type (Fig. 7d, and 7e). Our results, impaired  
20 development of aversion-resistant ethanol seeking behavior in the absence of TKR-1, was evident  
21 and reflect the importance of the involvement of TKR-1 function in the progress of compulsive  
22 ethanol seeking. Combined, these data suggest that SEB-3 transcriptionally regulates the TKR-1  
23 to enhance and progress the compulsive ethanol seeking behavior in ethanol experienced animals.



## 1 **Discussion**

2           Compulsivity is defined as repetitive attempts despite facing adverse consequences and  
3 compel individuals to perform to be relieved from stress or anxiety (<sup>68</sup>). The repetitive or obsessive  
4 aspects and compulsive drinking scale has been adapted and help to evaluate the severity of AUD  
5 in human genetic studies for reliable assessing alcohol craving (<sup>6, 26, 27</sup>), that has been described  
6 as a compelling urge to intake alcohol and considered crucial for the maintenance of AUD (<sup>5</sup>). The  
7 compulsive alcohol seeking is characterized by an imbalance between superior drive to alcohol  
8 and disruption in control of alcohol use (<sup>12, 13</sup>). To model the development of compulsive  
9 engagement of alcohol seeking in *C. elegans*, we showed following: i) enhanced preference of  
10 ethanol, ii) repetitive attempts to seek, and iii) enhanced aversion-resistant ethanol seeking.

11           Despite baseline aversive response to ethanol in acute exposure, *C. elegans* exhibit state-  
12 dependent ethanol seeking behavior, which is a significantly potentiated preference for ethanol  
13 after the prolonged experience of ethanol (<sup>21</sup>). In addition, *C. elegans* also recapitulates the  
14 behavioral traits of alcohol-dependent animals, known as studies in mammals. Ethanol pretreated  
15 worms showed distinct orientation while seeking for ethanol and a pronounced tendency to stay in  
16 the limited region where ethanol is, even though their locomotion and exploratory behavior were  
17 not damaged by the pretreatment of ethanol (Fig. 1 and 2). The increase in exploratory behavior  
18 during ethanol withdrawal is consistent with the evident demonstration of ethanol-withdrawal  
19 symptom in *C. elegans*, as seen in our previous study (<sup>22</sup>), and nicotine, classified as a  
20 psychostimulant like ethanol, can also be compared to promoting withdrawal-induced motor  
21 stimulation in *C. elegans* (<sup>69</sup>). The locomotion trajectories are depending on the transition between  
22 distinct motor states, which is the modulation of random exploration behavior (<sup>70, 71, 72, 73</sup>). Since  
23 the long-term behavioral state of exploration in *C. elegans* is modulated by neuropeptide signals

1 including *seb-3* (<sup>74, 75, 22</sup>), the change in exploration behavior of ethanol pretreated animals can be  
2 considered in association with the dependence modulation by neuropeptides signaling.

3 Ethanol pretreated animals also represented repetitive attempts and endurance to cross the  
4 chemical barrier to move to the ethanol area and consequently, crossed the barrier (Fig. 3).  
5 Chemotaxis behaviors are regulated primarily by the chemosensory neurons and modulated by  
6 integration of signaling with interneurons (<sup>76, 77</sup>). Recent studies on multisensory integration of the  
7 worms have provided sophisticated experimental manipulation with complex behavioral decision  
8 paradigms *in vivo* animals where information from distinct sensory networks is concurrently  
9 processed to demonstrate the comprehensible representation of the environment (<sup>78, 79, 80</sup>). We  
10 introduced nociceptive stimuli, of which perception and mediation are well defined (<sup>38, 81, 82, 83</sup>),  
11 as an obstacle to interfere with the animals' ethanol seeking behavior. Since ethanol pretreatment  
12 does not change the worm's sensitivity to the aversive stimulus (Fig.3b), ethanol seeking against  
13 the aversive chemical barrier promise as an endophenotype for compulsive ethanol seeking.  
14 Together with persistent drug seeking despite aversive consequences, aversion-resistant alcohol  
15 intake is increasingly recognized as a pivotal characteristic of addiction and is being investigated  
16 as a model of compulsive behavior (<sup>84, 85, 86, 87</sup>). The progress of compulsivity is hypothesized to  
17 be imbalanced between enhanced ethanol seeking and loss of controlling avoidance program. *C.*  
18 *elegans* detect the aversive stimuli in the environment and avoid noxious chemicals to cope with  
19 unfavorable situation. After repeated trial, crossing over aversive stimuli for ethanol seeking is  
20 depending on the concentration of aversive barrier suggesting the strength of an animal's innate  
21 state that modulate ethanol preference results in compulsive seeking. We introduced various  
22 nociceptive chemicals, of which avoidance is mediated by polymodal sensory neurons for  
23 nociception (<sup>39, 38</sup>), to rule out the possibility that overcoming aversive barrier for ethanol seeking

1 was specific to certain aversive stimuli. For example, in those cases where only the receptors for  
2 the copper sensation are downregulated during pretreatment instead of modulation of the overall  
3 circuit of attraction or avoidance program depending on the state.  $\text{Cu}^{2+}$  and denatonium benzoate  
4 effectively interfere with ethanol seeking behavior in concentration dependent manner. Quinine  
5 also works in a similar way, but only a low concentration was applicable due to the solubility in  
6 ethanol as a solvent (data not shown). Together with increased ethanol preference, we demonstrate  
7 the ethanol dependent behaviors of *C. elegans* that parallels compulsive alcohol seeking behavior  
8 in mammals.

9 Neuromodulation via neuropeptides signaling has been shown to have a pivotal roles in the  
10 development of AUD from worms to human (<sup>20, 22, 88, 89, 90, 91, 33</sup>). We demonstrate that SEB-3, a  
11 CRF (corticotropin-releasing factor) receptor-like GPCR in *C. elegans*, positively regulates  
12 ethanol preference and also has a role in the progress of compulsive ethanol seeking over adverse  
13 stimuli after prolonged preexposure to ethanol. Neuropeptidergic signaling of CRF has been  
14 studied as a key element that lead to AUD and comorbidities in a way to compensate for the distress  
15 associated with substance withdrawal and discontinuation. Neuropeptides signaling provides  
16 powerful mechanisms for rapid physiological adjustment to kaleidoscopic environmental changes  
17 and maintain systemic function by precise integration of signal flow. A maladaptation in  
18 multisensory integration has been reported in individuals diagnosed with compulsive behaviors (<sup>92,</sup>  
19 <sup>93</sup>). Previously, we have shown insight into how SEB-3 facilitates the progress of compulsive  
20 behavior by demonstrating that SEB-3 enhances motivational state and leads animals to engage  
21 obsessively in sexual drive, superseding the avoidance program of locomotion under negative  
22 stimuli (<sup>94</sup>). The animal has to consider its physiological statuses such as hunger and sexual drive  
23 and must monitor its environment to determine whether stressful conditions warrant the expression

1 of their innate urges. The CRF (corticotropin-releasing factor) system plays a pivotal role in  
2 mediating stress responses in the brain from amphibians to primates (<sup>95, 96, 97, 98</sup>). A CRF  
3 (corticotropin-releasing factor) receptor has been implicated in the pathophysiology of compulsive  
4 behavior such as anxiety and AUD (<sup>99, 100, 101</sup>). Stress pathways have been studied as key  
5 fundamentals of neural systems that drive alcohol and drug dependence. The brain stress system  
6 is activated and sensitized during repeated withdrawal and lead to a negative emotional state that  
7 promotes dependence (<sup>102</sup>). Indeed, the *seb-3(eg696)* gf animals, originally isolated as a genetic  
8 variant showing enhanced arousal and represented altered susceptibility to AUD such as enhanced  
9 acute functional tolerance to ethanol and withdrawal behavior (<sup>22</sup>).

10 Like CRF, Tachykinin /Neurokinin is one of the strongest conserved neuropeptide systems  
11 across bilaterians, of which both peptide and receptor orthologues are represented in *C.elegans*  
12 (<sup>58</sup>). The *tkr-1*, *tkr-2*, and *tkr-3* have been categorized into tachykinin/ neurokinin receptor-like  
13 group (<sup>103, 104, 105</sup>) and RNAi functional screens revealed *tkr-1* affects fat metabolism and  
14 deposition (<sup>106</sup>). We report *tkr-1* and *tkr-2*, close to NK1R and NK3R, have a prominent role in the  
15 progress of compulsive ethanol seeking. NK1R preferentially mediates the signal of Substance P  
16 (SP), belongs to the tachykinin/neurokinin family of neuropeptides (<sup>107, 108</sup>). SP and NK1R are  
17 widespread in the nervous system in mammals. NK1R has been studied in correlation with the  
18 stress response related to anxiety and depression (<sup>62, 63, 64</sup>). Recently after the failure of CRFR1  
19 antagonist in Clinical trials (<sup>109, 110</sup>), the increasing evidence of neurokinin receptors related to  
20 alcohol and drug dependence has been more highlighted. An activation of both NK1R and NK3R  
21 facilitate dopamine release in the NAc (<sup>111</sup>) and NK1R antagonist was reported to reduce cocaine-  
22 induced DA release (<sup>112</sup>). Antagonism of NK1R and KO mice reduces alcohol consumption (<sup>113</sup>)  
23 and Antagonism of NK1R decreases alcohol self-administration in alcohol-preferring rats (<sup>114</sup>).

1 Furthermore, adeno-associated virus-mediated overexpression of NK1R in the central amygdala  
2 increased alcohol self-administration (<sup>115</sup>), which is consistent with our finding. A Family-based  
3 association study in human genetics have also reported NK3R is associated with alcohol and  
4 cocaine dependence (<sup>116</sup>).

5 We report that SEB-3 facilitates animal drive to seek ethanol over noxious stimuli  
6 representing enhanced compulsive seeking. Our functional genomics study revealed that TKR-1  
7 is upregulated in *seb-3* gf strain, which is defined as compulsive ethanol seeking animals, and  
8 functions in the development of compulsive ethanol seeking. Interestingly, *sodh-1*, which showed  
9 a significant alcohol intoxication phenotype in the orthogonal test for functional validation of ADH  
10 (alcohol dehydrogenase) as a human GWAS candidate related to heavy alcohol consumption (<sup>25</sup>),  
11 is also upregulated in *seb-3* gf animals (Sup.1). These results also demonstrate the potential of our  
12 investigation as a scalable model to accelerate the functional validation of alcohol dependence  
13 associated with networks of epistatic interactions. Despite strong evidence of the crucial role of  
14 the CRF system in the development of alcohol dependence, there are concerns about the  
15 importance of the CRF system for drug target based on recent failures of CRF1 antagonist clinical  
16 trials for alcohol dependence. Here, the conservation of ethanol phenotypes across species suggests  
17 that a gradual increase of dependence-induced compulsivity is progressed by the interplay between  
18 CRF and Neurokinin signaling. Further investigation of interactions will provide significance to  
19 understand the neurobiological mechanism to progress AUD for advanced clinical benefits.

20

21

22

23

## 1 Acknowledgments

2 This work was supported by College of Medicine, University of Tennessee Health Science Center  
3 (UTHSC). We thank the *C. elegans* Genetics Center (CGC) for providing strains, which is funded  
4 by NIH Office of Research Infrastructure Programs (P40 OD010440). Authors declare no conflict  
5 of interests.

6

7

8

## 9 References

- 10 1 Kaplan, H. L., Sellers, E. M., Hamilton, C., Naranjo, C. A. & Dorian, P. Is there acute tolerance to  
11 alcohol at steady state? *Journal of studies on alcohol* **46**, 253-256 (1985).
- 12 2 Korpi, E. R. *et al.* Mechanisms of Action and Persistent Neuroplasticity by Drugs of Abuse.  
13 *Pharmacological reviews* **67**, 872-1004, doi:10.1124/pr.115.010967 (2015).
- 14 3 Wallace, M. J. *et al.* Acute functional tolerance to ethanol mediated by protein kinase Cepsilon.  
15 *Neuropsychopharmacology : official publication of the American College of*  
16 *Neuropsychopharmacology* **32**, 127-136, doi:10.1038/sj.npp.1301059 (2007).
- 17 4 Rohsenow, D. J. & Monti, P. M. Does urge to drink predict relapse after treatment? *Alcohol Res*  
18 *Health* **23**, 225-232 (1999).
- 19 5 Koob, G. F. Animal models of craving for ethanol. *Addiction* **95 Suppl 2**, S73-81,  
20 doi:10.1080/09652140050111663 (2000).
- 21 6 Flannery, B. A. *et al.* The role of craving in alcohol use, dependence, and treatment. *Alcohol Clin*  
22 *Exp Res* **25**, 299-308 (2001).
- 23 7 Koob, G. F. & Le Moal, M. Drug abuse: hedonic homeostatic dysregulation. *Science* **278**, 52-58,  
24 doi:10.1126/science.278.5335.52 (1997).
- 25 8 Funk, C. K., O'Dell, L. E., Crawford, E. F. & Koob, G. F. Corticotropin-releasing factor within the  
26 central nucleus of the amygdala mediates enhanced ethanol self-administration in withdrawn,  
27 ethanol-dependent rats. *The Journal of neuroscience : the official journal of the Society for*  
28 *Neuroscience* **26**, 11324-11332, doi:10.1523/JNEUROSCI.3096-06.2006 (2006).
- 29 9 Spanagel, R. & Kiefer, F. Drugs for relapse prevention of alcoholism: ten years of progress.  
30 *Trends in pharmacological sciences* **29**, 109-115, doi:10.1016/j.tips.2007.12.005 (2008).
- 31 10 Wise, R. A. & Koob, G. F. The development and maintenance of drug addiction.  
32 *Neuropsychopharmacology* **39**, 254-262, doi:10.1038/npp.2013.261 (2014).
- 33 11 Kranzler, H. R. *et al.* Genome-wide association study of alcohol consumption and use disorder in  
34 274,424 individuals from multiple populations. *Nat Commun* **10**, 1499, doi:10.1038/s41467-019-  
35 09480-8 (2019).
- 36 12 Baler, R. D. & Volkow, N. D. Drug addiction: the neurobiology of disrupted self-control. *Trends*  
37 *Mol Med* **12**, 559-566, doi:10.1016/j.molmed.2006.10.005 (2006).

- 1 13 Koob, G. F. & Volkow, N. D. Neurobiology of addiction: a neurocircuitry analysis. *Lancet*  
2 *Psychiatry* **3**, 760-773, doi:10.1016/S2215-0366(16)00104-8 (2016).
- 3 14 White, J. G., Southgate, E., Thomson, J. N. & Brenner, S. The structure of the nervous system of  
4 the nematode *Caenorhabditis elegans*. *Philosophical transactions of the Royal Society of London.*  
5 *Series B, Biological sciences* **314**, 1-340, doi:10.1098/rstb.1986.0056 (1986).
- 6 15 Varshney, L. R., Chen, B. L., Paniagua, E., Hall, D. H. & Chklovskii, D. B. Structural properties of  
7 the *Caenorhabditis elegans* neuronal network. *PLoS computational biology* **7**,  
8 doi:10.1371/journal.pcbi.1001066 (2011).
- 9 16 Jarrell, T. A. *et al.* The connectome of a decision-making neural network. *Science (New York,*  
10 *N.Y.)* **337**, 437-444, doi:10.1126/science.1221762 (2012).
- 11 17 Lai, C. H., Chou, C. Y., Ch'ang, L. Y., Liu, C. S. & Lin, W. Identification of novel human genes  
12 evolutionarily conserved in *Caenorhabditis elegans* by comparative proteomics. *Genome Res* **10**,  
13 703-713, doi:10.1101/gr.10.5.703 (2000).
- 14 18 Kim, W., Underwood, R. S., Greenwald, I. & Shaye, D. D. OrthoList 2: A New Comparative  
15 Genomic Analysis of Human and *Caenorhabditis elegans* Genes. *Genetics* **210**, 445-461,  
16 doi:10.1534/genetics.118.301307 (2018).
- 17 19 Davies, A. G. *et al.* A central role of the BK potassium channel in behavioral responses to ethanol  
18 in *C. elegans*. *Cell* **115**, 655-666, doi:10.1016/S0092-8674(03)00979-6 (2003).
- 19 20 Davies, A. G., Bettinger, J. C., Thiele, T. R., Judy, M. E. & McIntire, S. L. Natural variation in the  
20 *npr-1* gene modifies ethanol responses of wild strains of *C. elegans*. *Neuron* **42**, 731-743,  
21 doi:10.1016/j.neuron.2004.05.004 (2004).
- 22 21 Lee, J., Jee, C. & McIntire, S. L. Ethanol preference in *C. elegans*. *Genes, brain, and behavior* **8**,  
23 578-585, doi:10.1111/j.1601-183X.2009.00513.x (2009).
- 24 22 Jee, C. *et al.* SEB-3, a CRF receptor-like GPCR, regulates locomotor activity states, stress  
25 responses and ethanol tolerance in *Caenorhabditis elegans*. *Genes, brain, and behavior* **12**, 250-  
26 262, doi:10.1111/j.1601-183X.2012.00829.x (2013).
- 27 23 Barclay, J. W. *et al.* Presynaptic targets for acute ethanol sensitivity. *Biochem Soc Trans* **38**, 172-  
28 176, doi:10.1042/bst0380172 (2010).
- 29 24 Bettinger, J. C. & Davies, A. G. The role of the BK channel in ethanol response behaviors:  
30 evidence from model organism and human studies. *Front Physiol* **5**, 346,  
31 doi:10.3389/fphys.2014.00346 (2014).
- 32 25 Thompson, A. *et al.* Functional validity, role, and implications of heavy alcohol consumption  
33 genetic loci. *Sci Adv* **6**, eaay5034, doi:10.1126/sciadv.aay5034 (2020).
- 34 26 Anton, R. F., Moak, D. H. & Latham, P. K. The obsessive compulsive drinking scale: A new  
35 method of assessing outcome in alcoholism treatment studies. *Arch Gen Psychiatry* **53**, 225-231,  
36 doi:10.1001/archpsyc.1996.01830030047008 (1996).
- 37 27 Modell, J. G., Glaser, F. B., Cyr, L. & Mountz, J. M. Obsessive and compulsive characteristics of  
38 craving for alcohol in alcohol abuse and dependence. *Alcohol Clin Exp Res* **16**, 272-274,  
39 doi:10.1111/j.1530-0277.1992.tb01375.x (1992).
- 40 28 Valdez, G. R., Sabino, V. & Koob, G. F. Increased anxiety-like behavior and ethanol self-  
41 administration in dependent rats: reversal via corticotropin-releasing factor-2 receptor  
42 activation. *Alcoholism, clinical and experimental research* **28**, 865-872 (2004).
- 43 29 Nie, Z. *et al.* Ethanol Augments GABAergic Transmission in the Central Amygdala via CRF1  
44 Receptors. *Science* **303**, 1512-1514, doi:10.1126/science.1092550 (2004).
- 45 30 Hansson, A. C. *et al.* Variation at the rat *Crrh1* locus and sensitivity to relapse into alcohol  
46 seeking induced by environmental stress. *Proceedings of the National Academy of Sciences of*  
47 *the United States of America* **103**, 15236-15241, doi:10.1073/pnas.0604419103 (2006).

- 1 31 Gehlert, D. R. *et al.* 3-(4-Chloro-2-morpholin-4-yl-thiazol-5-yl)-8-(1-ethylpropyl)-2,6-dimethyl-  
2 imidazo[1,2-b]pyridazine: a novel brain-penetrant, orally available corticotropin-releasing factor  
3 receptor 1 antagonist with efficacy in animal models of alcoholism. *The Journal of neuroscience :  
4 the official journal of the Society for Neuroscience* **27**, 2718-2726, doi:10.1523/JNEUROSCI.4985-  
5 06.2007 (2007).
- 6 32 Weiss, F. *et al.* Compulsive drug-seeking behavior and relapse. Neuroadaptation, stress, and  
7 conditioning factors. *Ann N Y Acad Sci* **937**, 1-26, doi:10.1111/j.1749-6632.2001.tb03556.x  
8 (2001).
- 9 33 Gelernter, J. *et al.* Genome-wide Association Study of Maximum Habitual Alcohol Intake in  
10 >140,000 U.S. European and African American Veterans Yields Novel Risk Loci. *Biol Psychiatry*  
11 **86**, 365-376, doi:10.1016/j.biopsych.2019.03.984 (2019).
- 12 34 Brenner, S. The genetics of *Caenorhabditis elegans*. *Genetics* **77**, 71-94 (1974).
- 13 35 Sulston, J. E. & Brenner, S. The DNA of *Caenorhabditis elegans*. *Genetics* **77**, 95-104 (1974).
- 14 36 Ward, S. Chemotaxis by the nematode *Caenorhabditis elegans*: identification of attractants and  
15 analysis of the response by use of mutants. *Proc Natl Acad Sci U S A* **70**, 817-821,  
16 doi:10.1073/pnas.70.3.817 (1973).
- 17 37 Bargmann, C. I., Hartwig, E. & Horvitz, H. R. Odorant-selective genes and neurons mediate  
18 olfaction in *C. elegans*. *Cell* **74**, 515-527, doi:10.1016/0092-8674(93)80053-h (1993).
- 19 38 Hilliard, M. A., Bergamasco, C., Arbucci, S., Plasterk, R. H. & Bazzicalupo, P. Worms taste bitter:  
20 ASH neurons, QUI-1, GPA-3 and ODR-3 mediate quinine avoidance in *Caenorhabditis elegans*.  
21 *The EMBO journal* **23**, 1101-1111, doi:10.1038/sj.emboj.7600107 (2004).
- 22 39 Hilliard, M. A., Bargmann, C. I. & Bazzicalupo, P. *C. elegans* responds to chemical repellents by  
23 integrating sensory inputs from the head and the tail. *Current biology : CB* **12**, 730-734,  
24 doi:10.1016/s0960-9822(02)00813-8 (2002).
- 25 40 Gish, W. & States, D. J. Identification of protein coding regions by database similarity search. *Nat*  
26 *Genet* **3**, 266-272, doi:10.1038/ng0393-266 (1993).
- 27 41 Papadopoulos, J. S. & Agarwala, R. COBALT: constraint-based alignment tool for multiple protein  
28 sequences. *Bioinformatics* **23**, 1073-1079, doi:10.1093/bioinformatics/btm076 (2007).
- 29 42 Lu, S. *et al.* CDD/SPARCLE: the conserved domain database in 2020. *Nucleic Acids Res* **48**, D265-  
30 d268, doi:10.1093/nar/gkz991 (2020).
- 31 43 Anderson, E. N. *et al.* *C. elegans* lifespan extension by osmotic stress requires FUDR, base  
32 excision repair, FOXO, and sirtuins. *Mechanisms of Ageing and Development* **154**, 30-42,  
33 doi:10.1016/j.mad.2016.01.004 (2016).
- 34 44 Benjamini, Y. & Hochberg, Y. Controlling the False Discovery Rate: A Practical and Powerful  
35 Approach to Multiple Testing. *Journal of the Royal Statistical Society. Series B (Methodological)*  
36 **57**, 289-300 (1995).
- 37 45 Ashburner, M. *et al.* Gene ontology: tool for the unification of biology. The Gene Ontology  
38 Consortium. *Nat Genet* **25**, 25-29, doi:10.1038/75556 (2000).
- 39 46 Mi, H., Muruganujan, A., Casagrande, J. T. & Thomas, P. D. Large-scale gene function analysis  
40 with the PANTHER classification system. *Nat Protoc* **8**, 1551-1566, doi:10.1038/nprot.2013.092  
41 (2013).
- 42 47 The Gene Ontology Resource: 20 years and still GOing strong. *Nucleic Acids Res* **47**, D330-d338,  
43 doi:10.1093/nar/gky1055 (2019).
- 44 48 Angeles-Albores, D., RY, N. L., Chan, J. & Sternberg, P. W. Tissue enrichment analysis for *C.*  
45 *elegans* genomics. *BMC Bioinformatics* **17**, 366, doi:10.1186/s12859-016-1229-9 (2016).
- 46 49 Grove, C. *et al.* Using WormBase: A Genome Biology Resource for *Caenorhabditis elegans* and  
47 Related Nematodes. *Methods Mol Biol* **1757**, 399-470, doi:10.1007/978-1-4939-7737-6\_14  
48 (2018).



- 1 50 Ahlenius, S. & Engel, J. Behavioral stimulation induced by ethanol withdrawal. *Pharmacol*  
2 *Biochem Behav* **2**, 847-850, doi:10.1016/0091-3057(74)90121-x (1974).
- 3 51 Burchi, E., Makris, N., Lee, M. R., Pallanti, S. & Hollander, E. Compulsivity in Alcohol Use Disorder  
4 and Obsessive Compulsive Disorder: Implications for Neuromodulation. *Frontiers in Behavioral*  
5 *Neuroscience* **13**, doi:10.3389/fnbeh.2019.00070 (2019).
- 6 52 Hyman, S. E. & Malenka, R. C. Addiction and the brain: the neurobiology of compulsion and its  
7 persistence. *Nat Rev Neurosci* **2**, 695-703, doi:10.1038/35094560 (2001).
- 8 53 Tiffany, S. T. & Carter, B. L. Is craving the source of compulsive drug use? *J Psychopharmacol* **12**,  
9 23-30, doi:10.1177/026988119801200104 (1998).
- 10 54 Kjelsberg, M. A., Cotecchia, S., Ostrowski, J., Caron, M. G. & Lefkowitz, R. J. Constitutive  
11 activation of the alpha 1B-adrenergic receptor by all amino acid substitutions at a single site.  
12 Evidence for a region which constrains receptor activation. *J Biol Chem* **267**, 1430-1433 (1992).
- 13 55 Nishihara, E. *et al.* A novel thyrotropin receptor germline mutation (Asp617Tyr) causing  
14 hereditary hyperthyroidism. *Endocr J* **54**, 927-934, doi:10.1507/endocrj.k07-088 (2007).
- 15 56 Abadji, V., Lucas-Lenard, J. M., Chin, C. & Kendall, D. A. Involvement of the carboxyl terminus of  
16 the third intracellular loop of the cannabinoid CB1 receptor in constitutive activation of Gs. *J*  
17 *Neurochem* **72**, 2032-2038, doi:10.1046/j.1471-4159.1999.0722032.x (1999).
- 18 57 Nässel, D. R., Zandawala, M., Kawada, T. & Satake, H. Tachykinins: Neuropeptides That Are  
19 Ancient, Diverse, Widespread and Functionally Pleiotropic. *Front Neurosci* **13**, 1262,  
20 doi:10.3389/fnins.2019.01262 (2019).
- 21 58 Mirabeau, O. & Joly, J. S. Molecular evolution of peptidergic signaling systems in bilaterians.  
22 *Proc Natl Acad Sci U S A* **110**, E2028-2037, doi:10.1073/pnas.1219956110 (2013).
- 23 59 Steinhoff, M. S., von Mentzer, B., Geppetti, P., Pothoulakis, C. & Bunnett, N. W. Tachykinins and  
24 their receptors: contributions to physiological control and the mechanisms of disease. *Physiol*  
25 *Rev* **94**, 265-301, doi:10.1152/physrev.00031.2013 (2014).
- 26 60 Gayen, A., Goswami, S. K. & Mukhopadhyay, C. NMR evidence of GM1-induced conformational  
27 change of Substance P using isotropic bicelles. *Biochim Biophys Acta* **1808**, 127-139,  
28 doi:10.1016/j.bbamem.2010.09.023 (2011).
- 29 61 Schöppe, J. *et al.* Crystal structures of the human neurokinin 1 receptor in complex with  
30 clinically used antagonists. *Nat Commun* **10**, 17, doi:10.1038/s41467-018-07939-8 (2019).
- 31 62 Ebner, K., Rupniak, N. M., Saria, A. & Singewald, N. Substance P in the medial amygdala:  
32 emotional stress-sensitive release and modulation of anxiety-related behavior in rats. *Proc Natl*  
33 *Acad Sci U S A* **101**, 4280-4285, doi:10.1073/pnas.0400794101 (2004).
- 34 63 Ebner, K., Singewald, G. M., Whittle, N., Ferraguti, F. & Singewald, N. Neurokinin 1 receptor  
35 antagonism promotes active stress coping via enhanced septal 5-HT transmission.  
36 *Neuropsychopharmacology* **33**, 1929-1941, doi:10.1038/sj.npp.1301594 (2008).
- 37 64 Hoppe, J. M. *et al.* Association between amygdala neurokinin-1 receptor availability and anxiety-  
38 related personality traits. *Transl Psychiatry* **8**, 168, doi:10.1038/s41398-018-0163-1 (2018).
- 39 65 Otsuka, M. & Yoshioka, K. Neurotransmitter functions of mammalian tachykinins. *Physiol Rev* **73**,  
40 229-308, doi:10.1152/physrev.1993.73.2.229 (1993).
- 41 66 De Felipe, C. *et al.* Altered nociception, analgesia and aggression in mice lacking the receptor for  
42 substance P. *Nature* **392**, 394-397, doi:10.1038/32904 (1998).
- 43 67 Hökfelt, T., Kellerth, J. O., Nilsson, G. & Pernow, B. Substance p: localization in the central  
44 nervous system and in some primary sensory neurons. *Science* **190**, 889-890,  
45 doi:10.1126/science.242075 (1975).
- 46 68 Berlin, G. S. & Hollander, E. Compulsivity, impulsivity, and the DSM-5 process. *CNS Spectr* **19**, 62-  
47 68, doi:10.1017/s1092852913000722 (2014).

- 1 69 Feng, Z. *et al.* A *C. elegans* model of nicotine-dependent behavior: regulation by TRP-family  
2 channels. *Cell* **127**, 621-633, doi:10.1016/j.cell.2006.09.035 (2006).
- 3 70 Pierce-Shimomura, J. T., Morse, T. M. & Lockery, S. R. The fundamental role of pirouettes in  
4 *Caenorhabditis elegans* chemotaxis. *J Neurosci* **19**, 9557-9569, doi:10.1523/jneurosci.19-21-  
5 09557.1999 (1999).
- 6 71 Pierce-Shimomura, J. T. *et al.* Genetic analysis of crawling and swimming locomotory patterns in  
7 *C. elegans*. *Proc Natl Acad Sci U S A* **105**, 20982-20987, doi:10.1073/pnas.0810359105 (2008).
- 8 72 Wakabayashi, T., Kitagawa, I. & Shingai, R. Neurons regulating the duration of forward  
9 locomotion in *Caenorhabditis elegans*. *Neurosci Res* **50**, 103-111,  
10 doi:10.1016/j.neures.2004.06.005 (2004).
- 11 73 Klein, M. *et al.* Exploratory search during directed navigation in *C. elegans* and *Drosophila* larva.  
12 *Elife* **6**, doi:10.7554/eLife.30503 (2017).
- 13 74 Flavell, S. W. *et al.* Serotonin and the neuropeptide PDF initiate and extend opposing behavioral  
14 states in *C. elegans*. *Cell* **154**, 1023-1035, doi:10.1016/j.cell.2013.08.001 (2013).
- 15 75 Campbell, J. C., Polan-Couillard, L. F., Chin-Sang, I. D. & Bendena, W. G. NPR-9, a Galanin-Like G-  
16 Protein Coupled Receptor, and GLR-1 Regulate Interneuronal Circuitry Underlying Multisensory  
17 Integration of Environmental Cues in *Caenorhabditis elegans*. *PLoS genetics* **12**,  
18 doi:10.1371/journal.pgen.1006050 (2016).
- 19 76 Wes, P. D. & Bargmann, C. I. *C. elegans* odour discrimination requires asymmetric diversity in  
20 olfactory neurons. *Nature* **410**, 698-701, doi:10.1038/35070581 (2001).
- 21 77 Hukema, R. K., Rademakers, S. & Jansen, G. Gustatory plasticity in *C. elegans* involves integration  
22 of negative cues and NaCl taste mediated by serotonin, dopamine, and glutamate. *Learning &*  
23 *memory (Cold Spring Harbor, N.Y.)* **15**, 829-836, doi:10.1101/lm.994408 (2008).
- 24 78 Ghosh, D. D. *et al.* Neural Architecture of Hunger-Dependent Multisensory Decision Making in  
25 *C. elegans*. *Neuron* **92**, 1049-1062, doi:10.1016/j.neuron.2016.10.030 (2016).
- 26 79 Ishihara, T. *et al.* HEN-1, a Secretory Protein with an LDL Receptor Motif, Regulates Sensory  
27 Integration and Learning in *Caenorhabditis elegans*. *Cell* **109**, 639-649, doi:10.1016/s0092-  
28 8674(02)00748-1 (2002).
- 29 80 Shinkai, Y. *et al.* Behavioral choice between conflicting alternatives is regulated by a receptor  
30 guanylyl cyclase, GCY-28, and a receptor tyrosine kinase, SCD-2, in AIA interneurons of  
31 *Caenorhabditis elegans*. *J Neurosci* **31**, 3007-3015, doi:10.1523/jneurosci.4691-10.2011 (2011).
- 32 81 Hilliard, M. A. *et al.* In vivo imaging of *C. elegans* ASH neurons: cellular response and adaptation  
33 to chemical repellents. *Embo j* **24**, 63-72, doi:10.1038/sj.emboj.7600493 (2005).
- 34 82 Guo, M. *et al.* Reciprocal inhibition between sensory ASH and ASI neurons modulates  
35 nociception and avoidance in *Caenorhabditis elegans*. *Nature Communications* **6**, 5655,  
36 doi:10.1038/ncomms6655 (2015).
- 37 83 Marques, F. *et al.* Identification of avoidance genes through neural pathway-specific forward  
38 optogenetics. *PLoS Genet* **15**, e1008509, doi:10.1371/journal.pgen.1008509 (2019).
- 39 84 Deroche-Gamonet, V., Belin, D. & Piazza, P. V. Evidence for addiction-like behavior in the rat.  
40 *Science* **305**, 1014-1017, doi:10.1126/science.1099020 (2004).
- 41 85 Vengeliene, V., Celerier, E., Chaskiel, L., Penzo, F. & Spanagel, R. Compulsive alcohol drinking in  
42 rodents. *Addict Biol* **14**, 384-396, doi:10.1111/j.1369-1600.2009.00177.x (2009).
- 43 86 Seif, T. *et al.* Cortical activation of accumbens hyperpolarization-active NMDARs mediates  
44 aversion-resistant alcohol intake. *Nature neuroscience* **16**, 1094-1100, doi:10.1038/nn.3445  
45 (2013).
- 46 87 Barbier, E. *et al.* Dependence-induced increase of alcohol self-administration and compulsive  
47 drinking mediated by the histone methyltransferase PRDM2. *Mol Psychiatry* **22**, 1746-1758,  
48 doi:10.1038/mp.2016.131 (2017).

- 1 88 Egli, M. Advancing Pharmacotherapy Development from Preclinical Animal Studies. *Handb Exp*  
2 *Pharmacol* **248**, 537-578, doi:10.1007/164\_2017\_85 (2018).
- 3 89 Pastor, R. *et al.* Ethanol concentration-dependent effects and the role of stress on ethanol  
4 drinking in corticotropin-releasing factor type 1 and double type 1 and 2 receptor knockout  
5 mice. *Psychopharmacology (Berl)* **218**, 169-177, doi:10.1007/s00213-011-2284-6 (2011).
- 6 90 Ciccocioppo, R. *et al.* Stress-related neuropeptides and alcoholism: CRH, NPY, and beyond.  
7 *Alcohol* **43**, 491-498, doi:10.1016/j.alcohol.2009.08.003 (2009).
- 8 91 Schank, J. R., Ryabinin, A. E., Giardino, W. J., Ciccocioppo, R. & Heilig, M. Stress-Related  
9 Neuropeptides and Addictive Behaviors: Beyond the Usual Suspects. *Neuron* **76**, 192-208,  
10 doi:10.1016/j.neuron.2012.09.026 (2012).
- 11 92 Huey, E. D. *et al.* A psychological and neuroanatomical model of obsessive-compulsive disorder.  
12 *The Journal of neuropsychiatry and clinical neurosciences* **20**, 390-408,  
13 doi:10.1176/jnp.2008.20.4.390 (2008).
- 14 93 Ansari, Z. & Fardadi, J. S. Enhanced visual performance in obsessive compulsive personality  
15 disorder. *Scandinavian journal of psychology* **57**, 542-546, doi:10.1111/sjop.12312 (2016).
- 16 94 Jee, C., Goncalves, J. F., LeBoeuf, B. & Garcia, L. R. CRF-like receptor SEB-3 in sex-common  
17 interneurons potentiates stress handling and reproductive drive in *C. elegans*. *Nature*  
18 *communications* **7**, 11957, doi:10.1038/ncomms11957 (2016).
- 19 95 Clements, S., Schreck, C. B., Larsen, D. A. & Dickhoff, W. W. Central Administration of  
20 Corticotropin-Releasing Hormone Stimulates Locomotor Activity in Juvenile Chinook Salmon  
21 (*Oncorhynchus tshawytscha*). *General and Comparative Endocrinology* **125**, 319-327,  
22 doi:10.1006/gcen.2001.7707 (2002).
- 23 96 Johnson, R. W., von Borell, E. H., Anderson, L. L., Kojic, L. D. & Cunnick, J. E.  
24 Intracerebroventricular injection of corticotropin-releasing hormone in the pig: acute effects on  
25 behavior, adrenocorticotropin secretion, and immune suppression. *Endocrinology* **135**, 642-648,  
26 doi:10.1210/endo.135.2.8033811 (1994).
- 27 97 Lowry, C. A. & Moore, F. L. Corticotropin-releasing factor (CRF) antagonist suppresses stress-  
28 induced locomotor activity in an amphibian. *Hormones and behavior* **25**, 84-96 (1991).
- 29 98 Winslow, J. T., Newman, J. D. & Insel, T. R. CRH and alpha-helical-CRH modulate behavioral  
30 measures of arousal in monkeys. *Pharmacology, biochemistry, and behavior* **32**, 919-926 (1989).
- 31 99 Lee, E. H. & Tsai, M. J. The hippocampus and amygdala mediate the locomotor stimulating  
32 effects of corticotropin-releasing factor in mice. *Behav Neural Biol* **51**, 412-423 (1989).
- 33 100 Goeders, N. E. & Guerin, G. F. Non-contingent electric footshock facilitates the acquisition of  
34 intravenous cocaine self-administration in rats. *Psychopharmacology (Berl)* **114**, 63-70 (1994).
- 35 101 Piazza, P. V. & Le Moal, M. The role of stress in drug self-administration. *Trends Pharmacol Sci*  
36 **19**, 67-74 (1998).
- 37 102 Koob, G. F. A role for brain stress systems in addiction. *Neuron* **59**, 11-34 (2008).
- 38 103 Frooninckx, L. *et al.* Neuropeptide GPCRs in *C. elegans*. *Frontiers in endocrinology* **3**, 167,  
39 doi:10.3389/fendo.2012.00167 (2012).
- 40 104 Cardoso, J. C., Félix, R. C., Fonseca, V. G. & Power, D. M. Feeding and the rhodopsin family g-  
41 protein coupled receptors in nematodes and arthropods. *Front Endocrinol (Lausanne)* **3**, 157,  
42 doi:10.3389/fendo.2012.00157 (2012).
- 43 105 Hobert, O. The neuronal genome of *Caenorhabditis elegans*. *WormBook*, 1-106,  
44 doi:10.1895/wormbook.1.161.1 (2013).
- 45 106 Ashrafi, K. *et al.* Genome-wide RNAi analysis of *Caenorhabditis elegans* fat regulatory genes.  
46 *Nature* **421**, 268-272, doi:10.1038/nature01279 (2003).
- 47 107 Regoli, D., Drapeau, G., Dion, S. & D'Orléans-Juste, P. Pharmacological receptors for substance P  
48 and neurokinins. *Life Sci* **40**, 109-117, doi:10.1016/0024-3205(87)90349-3 (1987).

- 1 108 Hökfelt, T., Pernow, B. & Wahren, J. Substance P: a pioneer amongst neuropeptides. *J Intern*  
2 *Med* **249**, 27-40, doi:10.1046/j.0954-6820.2000.00773.x (2001).
- 3 109 Kwako, L. E. *et al.* The corticotropin releasing hormone-1 (CRH1) receptor antagonist  
4 pexacerfont in alcohol dependence: a randomized controlled experimental medicine study.  
5 *Neuropsychopharmacology* **40**, 1053-1063, doi:10.1038/npp.2014.306 (2015).
- 6 110 Schwandt, M. L. *et al.* The CRF1 Antagonist Verucerfont in Anxious Alcohol-Dependent Women:  
7 Translation of Neuroendocrine, But not of Anti-Craving Effects. *Neuropsychopharmacology* **41**,  
8 2818-2829, doi:10.1038/npp.2016.61 (2016).
- 9 111 Elliott, P. J., Mason, G. S., Stephens-Smith, M. & Hagan, R. M. Behavioural and biochemical  
10 responses following activation of midbrain dopamine pathways by receptor selective neurokinin  
11 agonists. *Neuropeptides* **19**, 119-126, doi:10.1016/0143-4179(91)90141-5 (1991).
- 12 112 Noailles, P. A. & Angulo, J. A. Neurokinin receptors modulate the neurochemical actions of  
13 cocaine. *Ann N Y Acad Sci* **965**, 267-273, doi:10.1111/j.1749-6632.2002.tb04168.x (2002).
- 14 113 Thorsell, A., Schank, J. R., Singley, E., Hunt, S. P. & Heilig, M. Neurokinin-1 receptors (NK1R:s),  
15 alcohol consumption, and alcohol reward in mice. *Psychopharmacology (Berl)* **209**, 103-111,  
16 doi:10.1007/s00213-010-1775-1 (2010).
- 17 114 Schank, J. R. *et al.* Tacr1 gene variation and neurokinin 1 receptor expression is associated with  
18 antagonist efficacy in genetically selected alcohol-preferring rats. *Biol Psychiatry* **73**, 774-781,  
19 doi:10.1016/j.biopsych.2012.12.027 (2013).
- 20 115 Nelson, B. S. *et al.* Escalated Alcohol Self-Administration and Sensitivity to Yohimbine-Induced  
21 Reinstatement in Alcohol Preferring Rats: Potential Role of Neurokinin-1 Receptors in the  
22 Amygdala. *Neuroscience* **413**, 77-85, doi:10.1016/j.neuroscience.2019.06.023 (2019).
- 23 116 Foroud, T. *et al.* The tachykinin receptor 3 is associated with alcohol and cocaine dependence.  
24 *Alcohol Clin Exp Res* **32**, 1023-1030, doi:10.1111/j.1530-0277.2008.00663.x (2008).

25

26

27

28

29

30

31

32

33

34

35

36

37

38

39

1 **Figure Legends**

2

3

4 **Fig.1** Ethanol-pretreated WT animals headed straight to the ethanol area and remained stayed.

5 (a, b) Trajectory of individual WT animal (Naïve or Ethanol pretreated). The naïve (a) or ethanol  
6 pretreated animals (b), respectively, were placed in the middle of assay plate that contains ethanol  
7 (300 mM) only in the left top well. All wells are marginally covered by media that allows free  
8 moving between the area. Ethanol-pretreated WT animals (4 hours;300mM) headed straight to  
9 ethanol area and stayed, whereas naïve wild type animals explored around.

10 (c, e) Behavioral quantification of individual animal (c; Naïve, d; 4hr-Ethanol pretreated) and  
11 average of total percentage time spent in the distinct area (e). The ethanol pretreated animals spent  
12 more time in ethanol area. The data were analyzed employing Chi-square test. chi-square test  
13 indicated;  $df = 60.67, 1 z = 7.789, ****P < 0.0001$

14

15

16

17

18

19 **Fig.2** Ethanol pretreated animal is not defective in the locomotion. The locomotion trajectory of  
20 naïve (a) or ethanol-pretreated (b) animals is represented. (c) The stimulation of locomotion,  
21 increase of speed and travel distance, was observed in ethanol pretreated WT animals.

22

23

24

25

1 **Fig.3** Behavioral quantification of compulsive ethanol seeking after exposure to ethanol against  
2 aversive chemical barrier.

3 (a) Diagrammatic representation exhibited experimental design to quantify aversion-resistant  
4 ethanol seeking. The different concentrations of  $\text{Cu}^{2+}$  created aversive barrier without mechanical  
5 obstacles to quantify the motivational strength of seeking ethanol behavior in animals. (b) Cu  
6 sensitivity of WT animals are not altered after ethanol exposure. (c) EtOH pretreated animals  
7 demonstrates more animals cross over the Cu barrier for ethanol (aversion-resistant seeking), in  
8 low concentration (2 and 5 mM), than does Naïve animals [ $F_{\text{EtOH pretreated}}(1, 18)=46.44, p<0.0001$ ;  
9  $F_{\text{Concentration}}(4,72)=99.01, p<0.0001$ ;  $F_{\text{pretreated} \times \text{Concentration}}(4, 72)=11.57, p<0.001$ ]. Moving to higher  
10 concentration of copper (10mM), ethanol pretreated WT animals failed to overcome the aversive  
11 barrier. A two-way ANOVA comparison of the animal status over concentrations of barrier  
12 showed significant differences based on EtOH pretreated, concentrations, and the interaction of  
13 the two. Significant post hoc differences (Bonferroni's test) between naïve and EtOH pretreated  
14 animals at no barrier, 2mM, 5mM, and 10mM is shown ( $p<0.0001, ****$ ). Values are mean  $\pm$  SEM.  
15  $N=10$  in each conc. (d) EtOH pretreated animals demonstrates more animals cross over the  
16 Denatorium barrier for ethanol (aversion-resistant seeking), in low concentration, than does Naïve  
17 animals [ $F_{\text{EtOH pretreated}}(1, 6)=598.8, p<0.0001$ ;  $F_{\text{Concentration}}(1.712, 10.27)=119, p<0.0001$ ;  $F_{\text{pretreated}}$   
18  $\times \text{Concentration}(2, 12)=45.81, p<0.0001$ ]. A two-way ANOVA comparison of the animal status over  
19 concentrations of barrier showed significant differences based on EtOH pretreated, concentrations,  
20 and the interaction of the two. Significant post hoc differences (Bonferroni's test) between naïve  
21 and EtOH pretreated animals at no barrier, 5mM, and 10mM is shown ( $p<0.01, **$ ). Values are  
22 mean  $\pm$  SEM.  $N=4$  in each conc.

23

24

25

26

27

28

1 **Fig. 4** SEB-3 facilitates the development of ethanol preference.

2 (a) Diagrammatic representation of ethanol preference assay. Naïve or ethanol pretreated animals  
3 remain free to explore on the quadrants plate before counting. (b) Naïve animals accumulate  
4 primarily in the non-ethanol region. One-way ANOVA,  $P > 0.05$ ,  $F(2, 66) = 2.539$ , ns compared to  
5 WT in post hoc multiple comparison test; Dunnett's. (c) Ethanol preference developed more  
6 rapidly and greater in *seb-3gf* animals, whereas impaired in *seb-3lf* animals. [ $F_{\text{Genotype}}(2,$   
7  $27) = 15.76$ ,  $p < 0.0001$ ;  $F_{\text{time}}(1.871, 37.42) = 72.56$ ,  $p < 0.0001$ ;  $F_{\text{Genotype} \times \text{time}}(4, 40) = 9.982$ ,  
8  $p < 0.001$ ]. A two-way ANOVA comparison showed significant differences based on genotype,  
9 time, and the interaction of the two. Significant post hoc differences (Bonferroni's multiple  
10 comparison test) between the genotypes (WT vs *seb-3gf*) or (WT vs *seb-3lf*) at naïve, 2hours, and  
11 4hours are shown ( $p < 0.05$ , \*;  $p < 0.01$ , \*\*;  $p < 0.0001$ , \*\*\*\*).

12

13 **Fig. 5** The ethanol pretreated *seb-3gf* animals for 4 hours surmount a stronger aversive barrier to  
14 seek ethanol. (a) Strength of ethanol seeking is represented by the SI under different concentration  
15 of copper barrier (no barrier, 10mM and 20mM). A *seb-3gf* strain demonstrates more animals cross  
16 over the barrier for ethanol (aversion-resistant seeking), in overall concentrations, than does the  
17 WT strain [ $F_{\text{Genotype}}(1, 18) = 35.78$ ,  $p < 0.0001$ ;  $F_{\text{Concentration}}(3, 53) = 40.32$ ,  $p < 0.0001$ ;  $F_{\text{Genotype} \times$   
18  $\text{Concentration}}(3, 53) = 6.586$ ,  $p < 0.001$ ]. A two-way ANOVA comparison of the strains over  
19 concentrations of barrier showed significant differences based on genotype, concentrations, and  
20 the interaction of the two. Significant post hoc differences (Dunnett's test) between no barrier  
21 versus 5mM, 10mM, or 20mM in each genotype (WT and *seb-3gf* animals) is shown ( $p < 0.05$ , \*;  
22  $p < 0.01$ , \*\*;  $p < 0.0001$ , \*\*\*\*). Box and whisker represent minimum to maximum of 10 trials of  
23 population assay (N=10). (b-e) Avoidance assay with drop test (0.1mM, 1mM, and 5mM CuSO<sub>4</sub>).  
24 The avoidance index (AI) in (b) is the number of positive responses divided by the total number  
25 of trials. The latency to stop forward and initiate backward movement was measured. Data were  
26 obtained from 10 or more animals and mean values from 3 or more trials were analyzed by one-  
27 way ANOVA with a post-hoc Dunnett's test; non-significant differences [ $p = 0.0820$ ,  $F_{\text{genotypes}}(1,$   
28  $7) = 4.117$ ,  $p = 0.7705$ ;  $F_{\text{concentration} \times \text{genotype}}(2, 7) = 0.2707$ ] (b) or two-tailed t-test;  $p < 0.05$ , \* (c-e). (f)  
29 The development of aversion-resistant ethanol seeking is impaired in *seb-3lf* animals. A two-way  
30 ANOVA comparison [ $F_{\text{Genotype}}(1, 17) = 24.64$ ,  $p < 0.0001$ ;  $F_{\text{Concentration}}(3, 30) = 18.35$ ,  $p < 0.0001$ ;

1  $F_{\text{Genotype} \times \text{Concentration}}(3, 40)=6.005, p=0.0018]$ . Significant post hoc differences (Dunnett's test)  
2 between no barrier versus 2mM, 5mM, or 10mM in each genotype ( $p<0.001, ***; p<0.0001, ****$ ).

3

4

5 **Fig. 6** Differentially expressed gene profiling of genetic variant vulnerable to compulsive seeking  
6 behavior. (a) Altered expression of transcripts in *seb-3gf*. Gene Ontology (GO) enrichment  
7 analysis revealed 11 GO terms that upregulated genes are enriched (b) and 7GO terms of  
8 downregulated genes (c).

9

10

11 **Fig. 7** Neurokinin receptors in *C. elegans*

12 (a) Sequence alignment of TKR-1 (NP\_499064.2), humanTACR1/NK1R (2KS9\_A),  
13 humanTACR3/NK3R (P29371), and tachykinin-like receptors of liver fluke (GAA51416) and  
14 octopus (BAD93354.1) revealed the consensus sequences of putative ligand binding pocket of  
15 TKR-1 (Yellow highlights). Red indicates highly conserved amino acids and blue indicates lower  
16 conservation. The diagram of full-length TKR-1 topology represents transmembrane helix  
17 domains and the consensus sequences of putative peptide ligand binding pocket (Red amino acids).

18 (b) Phylogenetic analysis of the Tachykinin/Neurokinin Receptor family (minimum evolution  
19 method). (c-e) Aversion-resistant ethanol seeking assay in *tkr-1(ok2886)* (c), *tkr-2(ok1620)* (d),  
20 and *tkr-3(ok381)* (e). A two-way ANOVA comparison shows the impaired development in *tkr-*  
21 *1(ok2886)* [ $F_{\text{Genotype}}(1, 58)=106.6, p<0.0001; F_{\text{Concentration}}(3, 58)=140.7, p<0.0001; F_{\text{Genotype} \times}$   
22  $\text{Concentration}}(3, 58)=9.495, p<0.0001]$ . Significant post hoc differences (Dunnett's test) between no  
23 barrier versus 2mM, 5mM, or 10mM in each genotype ( $p<0.0001, ****$ ); and *tkr-2(1620)*  
24 [ $F_{\text{Genotype}}(1, 16)=38.37, p<0.0001; F_{\text{Concentration}}(3, 34)=76.82, p<0.0001; F_{\text{Genotype} \times \text{Concentration}}(3,$   
25  $34)=6.030, p=0.0021]$ . Significant post hoc differences (Dunnett's test) between no barrier versus  
26 2mM, 5mM, or 10mM in each genotype ( $p<0.05, *; p<0.0001, ****$ ).

27



1 Figure.1

2

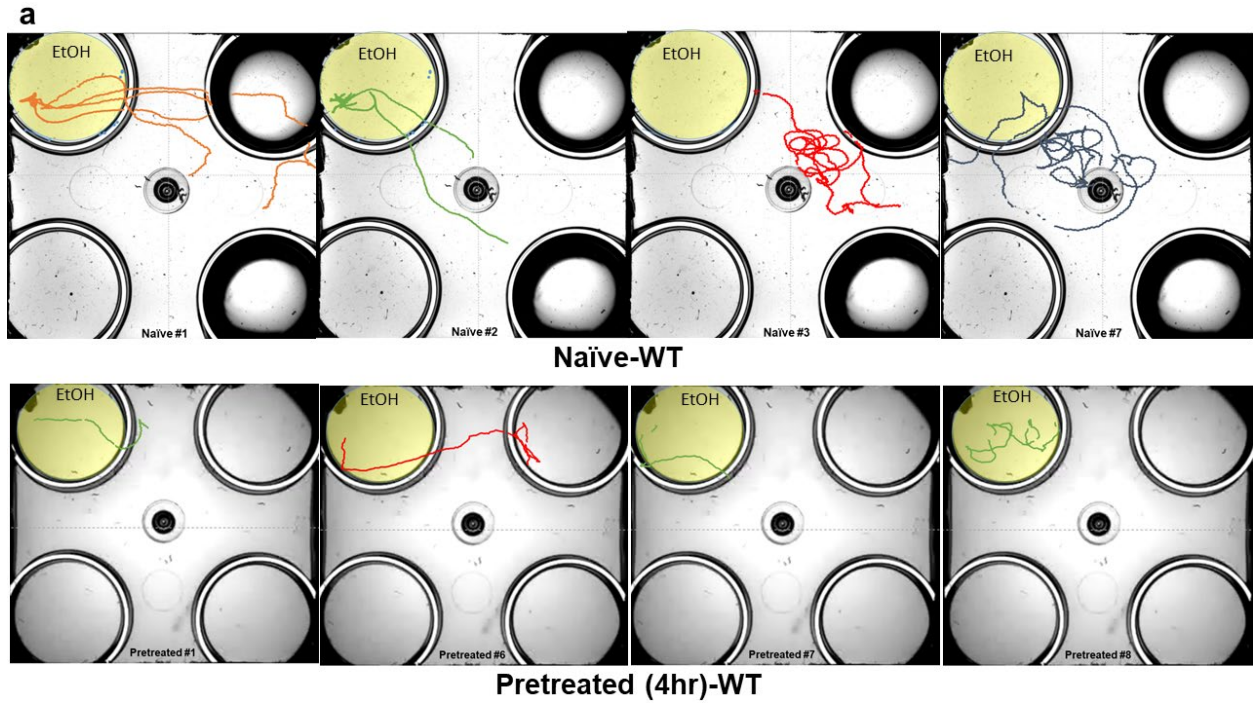

3

4

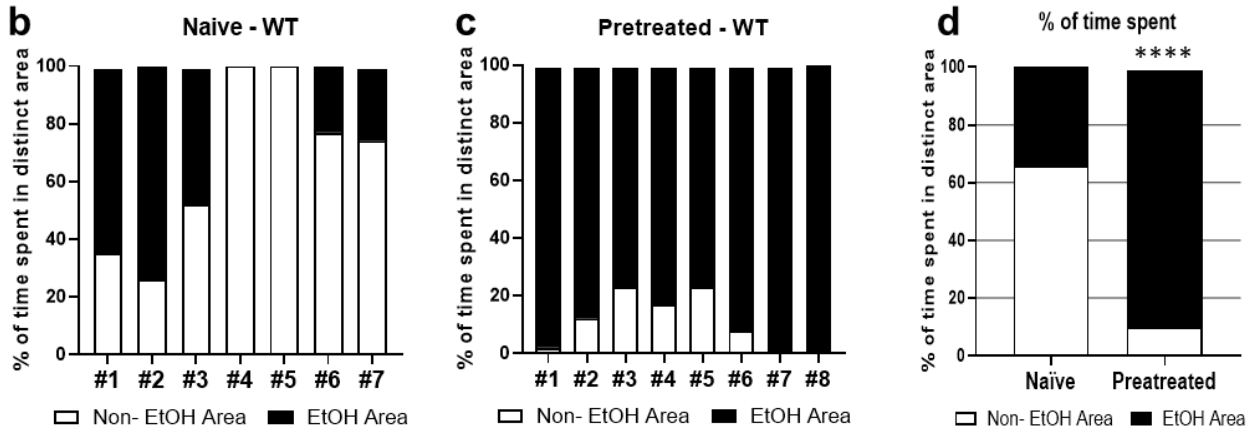

5

6

7

8

1 Figure.2

2

3

4

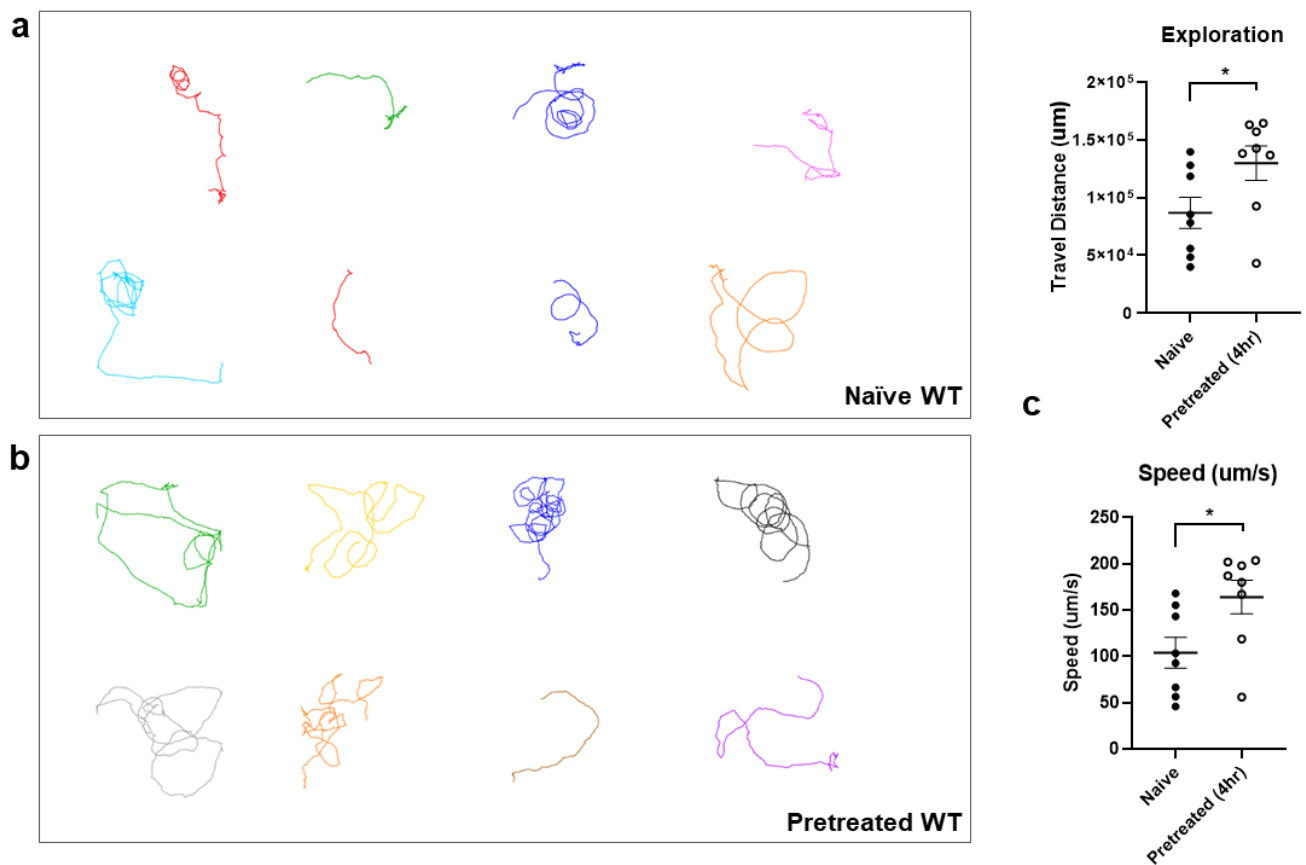

5

6

7

8

9

10

11

12

1 Figure.3

2

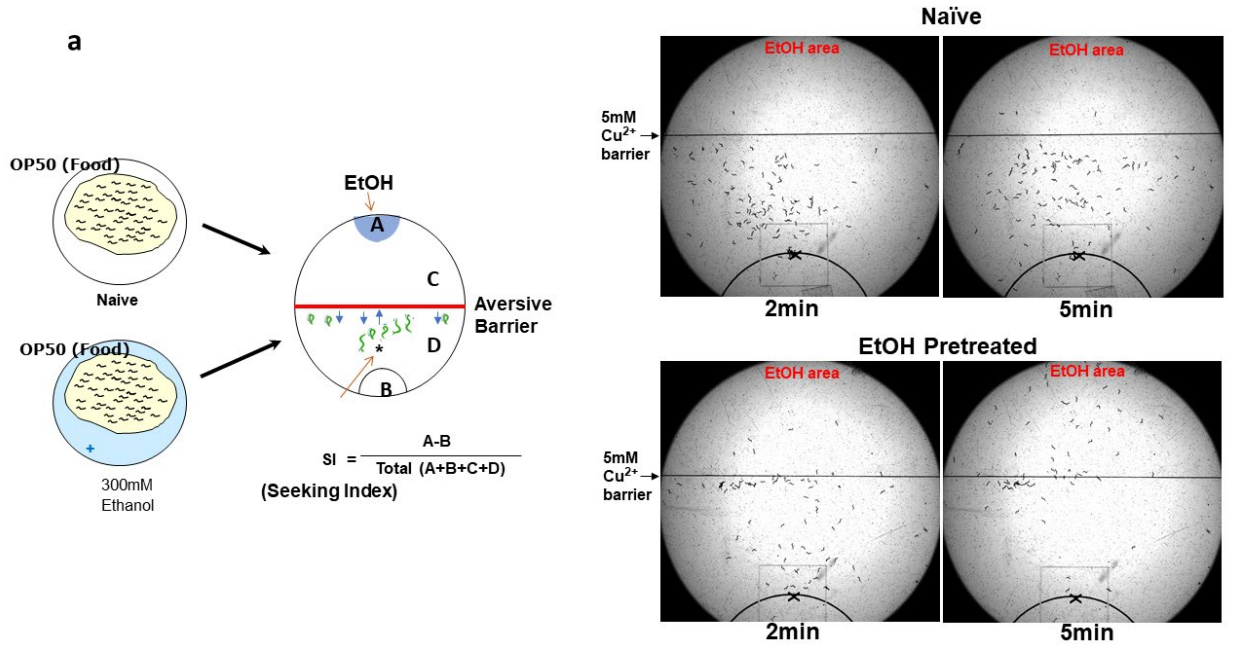

3

4

5

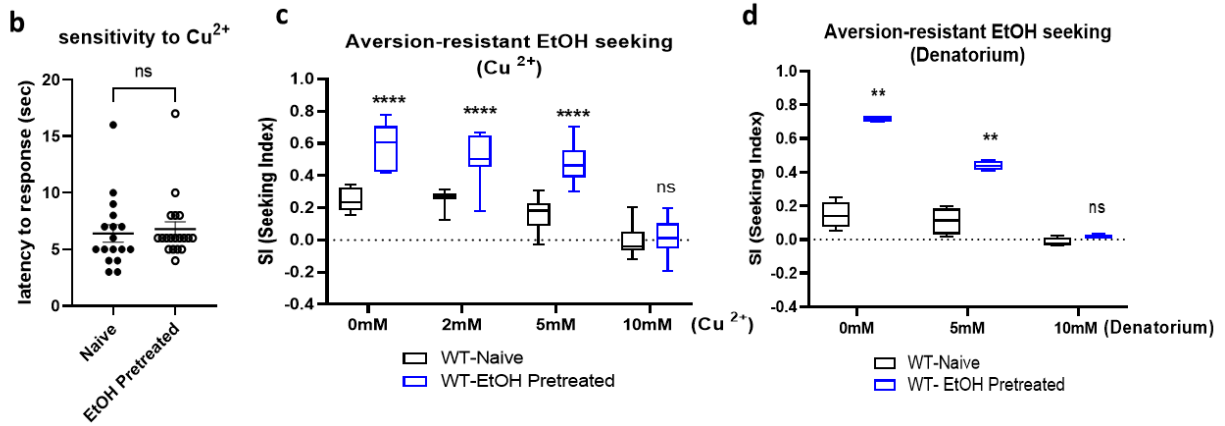

6

7

8

9

1 Figure.4

2

3

4

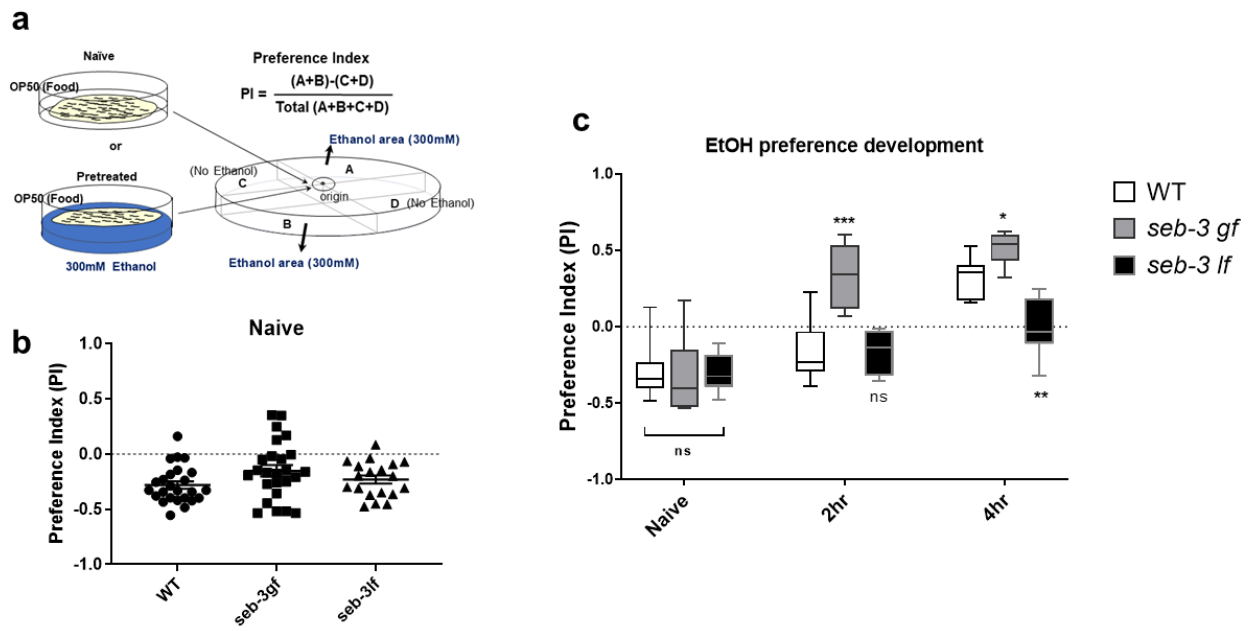

5

6

7

8

9

10

11

12

13

14

1 Figure.5

2

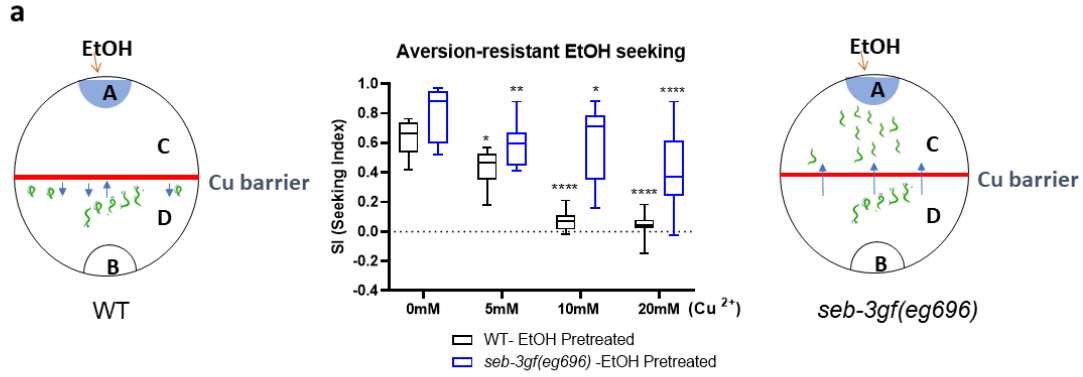

3

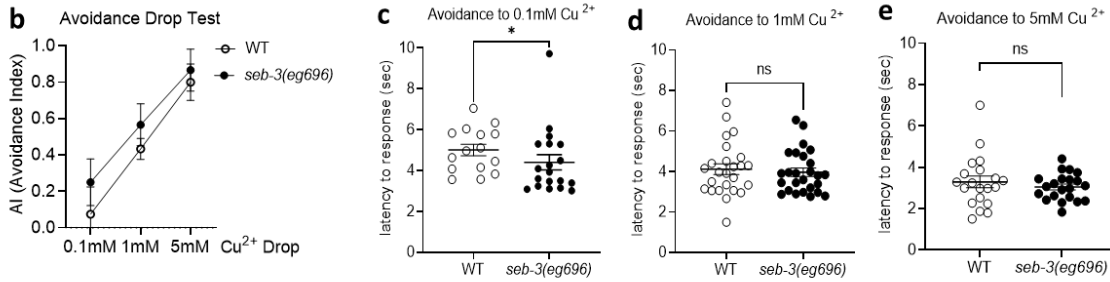

4

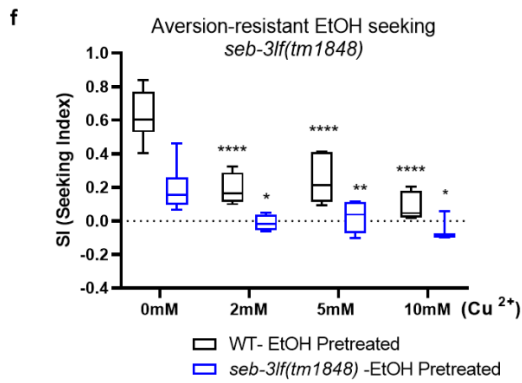

5

6

7

1 Figure.6

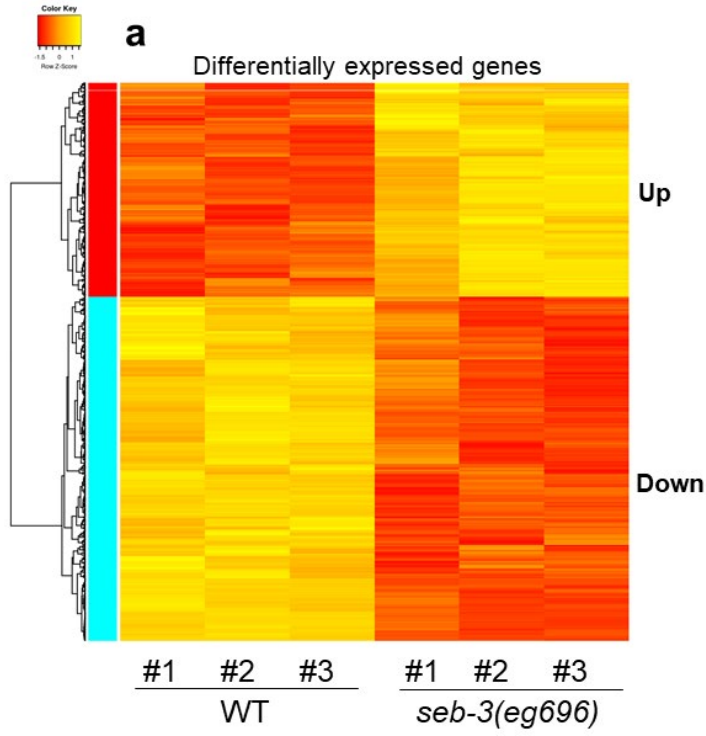

2

3

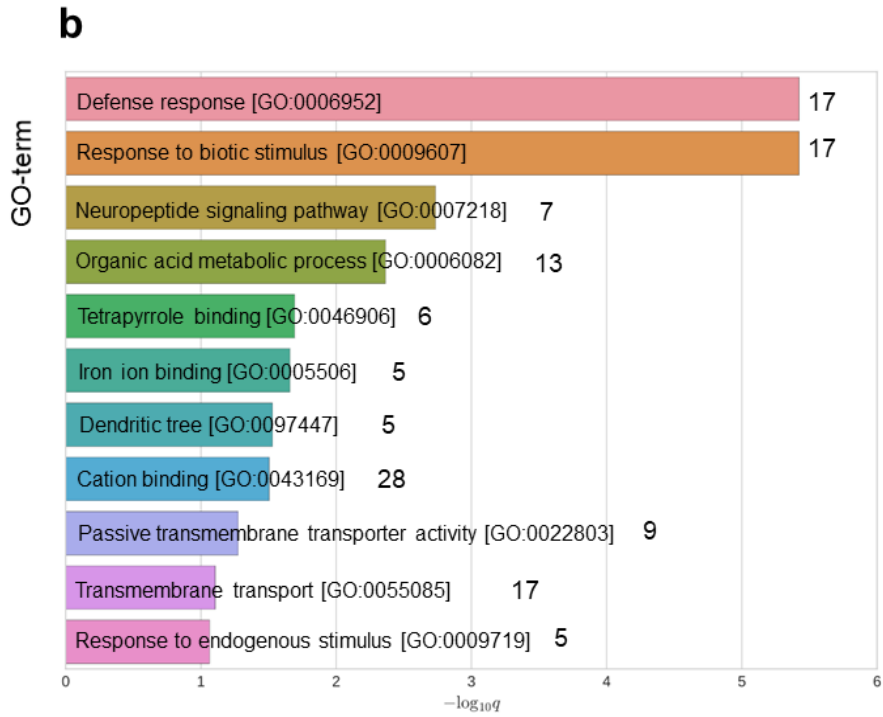

4

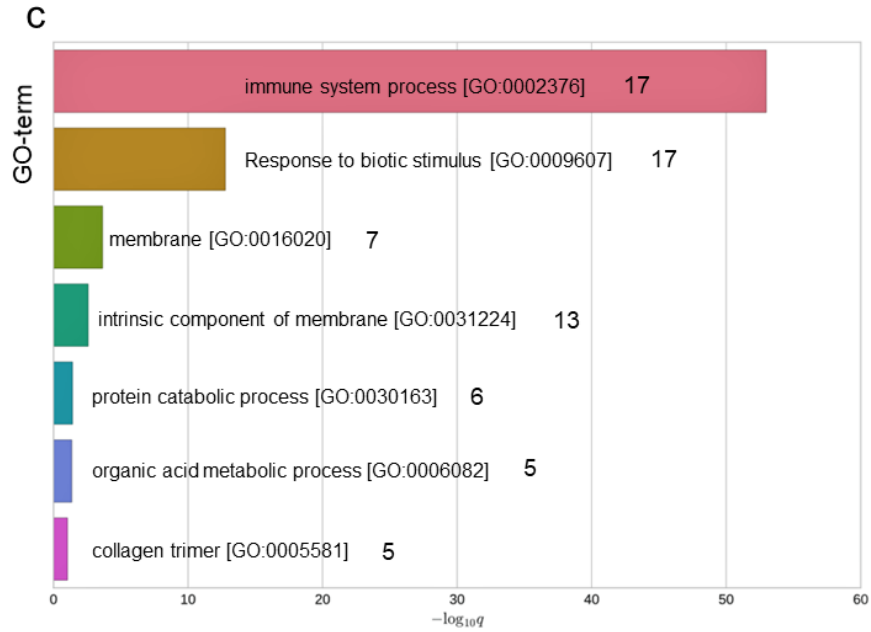

1  
2  
3  
4  
5  
6  
7  
8  
9  
10  
11  
12  
13  
14  
15

1 Figure.7

2 **a**

3

4

```

TKR-1 44 VFVAIAFVLLMTAIIIGNSVMMIYQHKVmhgyFNyFLNMAFADLLIALFNVTWYHlyydwMYGd-1CTLTSFF 122 Worm
hNK1R 33 VLWAAAYTVIVTSSVGNVVMVMIILAHKRmrtvTNYFLVNLAFEAESMAAFNTVVFYAvhneYYGlfyCFPHHFF 112 human
tachykinin-like receptor 9 GFVVFVFLVLLFSLGNFMVIYVIVKCRGlrvtvTNYFLNLSAGDLLTLFQIVPMHYVtr-dwIFGlsICLSQIF 87 Clonorchis sinensis
tachykinin related-peptide receptor 65 VFFIIIFLAMIIASIGNLIVMMIVLWHRmrtvTNYFLNLSAGDLLTLFQIVPMHYVtr-dwIFGlsICLSQIF 144 Common octopus
hNK3R 86 ALNSLAYGVVAVLGNLIVIMII LAHKRmrtvTNYFLVNLAFSDASMAAFNTLVFIYVhseWYFGanyCRFQNTFF 165 human
    
```

5

```

TKR-1 123 APITVSVCSMMALSHDRCAQVWNP1qkRpLSRKRSVIAIILIMVVSIVTALPFAIAasvnslytyd----- 189 Worm
hNK1R 113 AAAFASIYSMTAVAFDRYMAIHP1qppR-LSATATKVICVIMVLA LLAFGGYStttem----- 174 human
tachykinin-like receptor 88 FFIHAIISVFTVGIADRYTAIMP1rppR-IRPRTAIFYFIILAAVYVGLPSLIFanveatp1llrgssvkrnetqg 166 Clonorchis sinensis
tachykinin related-peptide receptor 145 PCTFSASVFTLMAIAIDRYLAIMRWV--R-MSAKVIVGLVIMVLA LLSLPLAIYsktetfsy----- 286 Common octopus
hNK3R 166 TAVFASIYSMTAIAVDRYMAIHP1kppR-LSATATKIVIGSIVILAH LLAFPKCLYsktkvm----- 227 human
    
```

6

```

TKR-1 190 -----vvtstvskaHVCAPv-----TFEKVLFGLIQLPIIILGSTFTRIAVAFratneatd-ss 246 Worm
hNK1R 175 -----psrvvCMIEWPEhpn-kiyKVHICVTLLIYVPLLVIGYAVTVGLTLwaseipgdssd 234 human
tachykinin-like receptor 167 dqnvtypnadtvtvatqledtrqCFLALHpk----fELDYALFTLLVPLMLVLAATYVPLSLRLwfhrgigeitr 241 Clonorchis sinensis
tachykinin related-peptide receptor 207 -----adgstrtlCLEQWpgnqrssvLVGWHITFIIIVNFMPLMFLIVTYTFLGKELwgkskaigents 270 Common octopus
hNK3R 228 -----pgrtlCVQWPEgp--kqFTPHIIIIILVWCFLLIMGITVYIVGITLwggeipgdtdc 285 human
    
```

7

8

```

TKR-1 247 lknhhtRAKSKAVKMLFLMVAVVCCILPVIYHAFAlieeff--daarSKYVYLIMTASSCAVNPIIYCFANerFRI 324 Worm
hNK1R 235 ryheqvSAKRKVVKMIIIVVCTFAICLPHIFILLpyindplylkkfIQQVYLAIMLNSSTMYNPIIYCCLNdrFRL 314 human
tachykinin-like receptor 242 aqvsvRSKRRVVKMCAVMCIFAICLPPVVFIIILrvkpefkrspptFTIFIAEWLNSNAIYNPIIYFTMnrFRN 321 Clonorchis sinensis
tachykinin related-peptide receptor 271 iqqqrVKAQRKVVKMIIIVVIFAVCLPMLYELLVssfpsinsyqyIQQIFLIIIMNSMNYNPIIYCWMMnrFRQ 350 Common octopus
hNK3R 286 kyheqlKAKRKKVMMIIVVMTFAICLPLVIYIILtaiyqqlnrwkyIQQVYLAIMLNSSTMYNPIIYCCLNkrFRA 365 human
    
```

9

```

TKR-1 325 GF 326 Worm
hNK1R 315 GF 316 human
tachykinin-like receptor 322 GL 323 Clonorchis sinensis
tachykinin related-peptide receptor 351 GF 352 Common octopus
hNK3R 366 GF 367 human
    
```

10

11

12

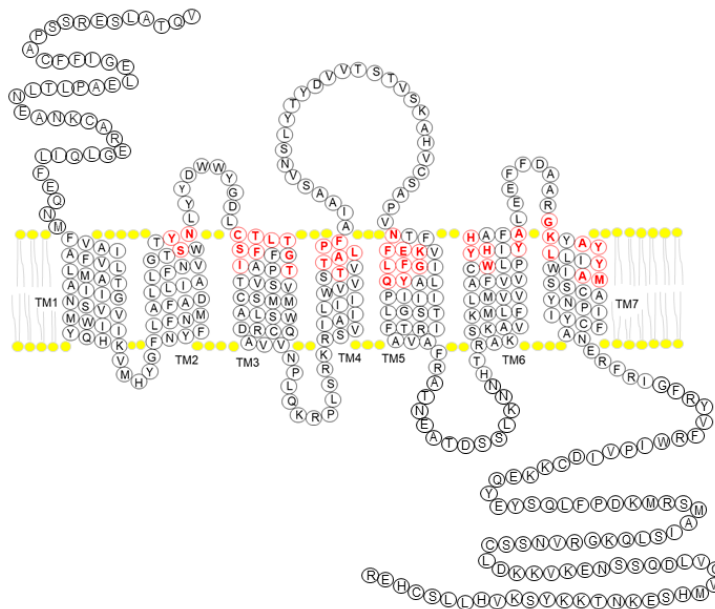

13

14

15



1

2

**b**

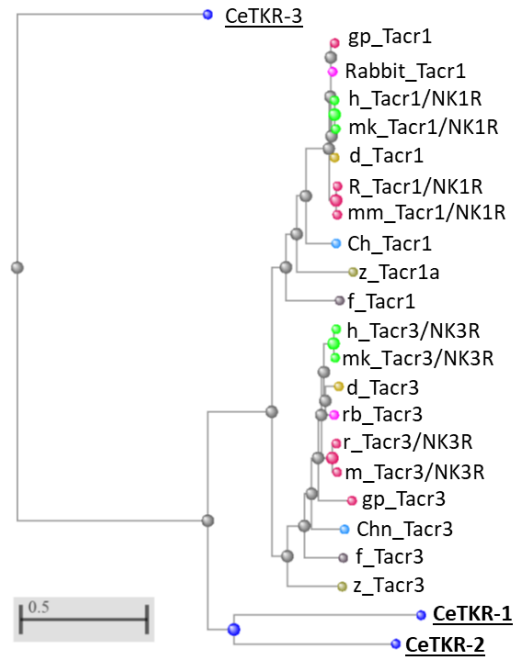

3

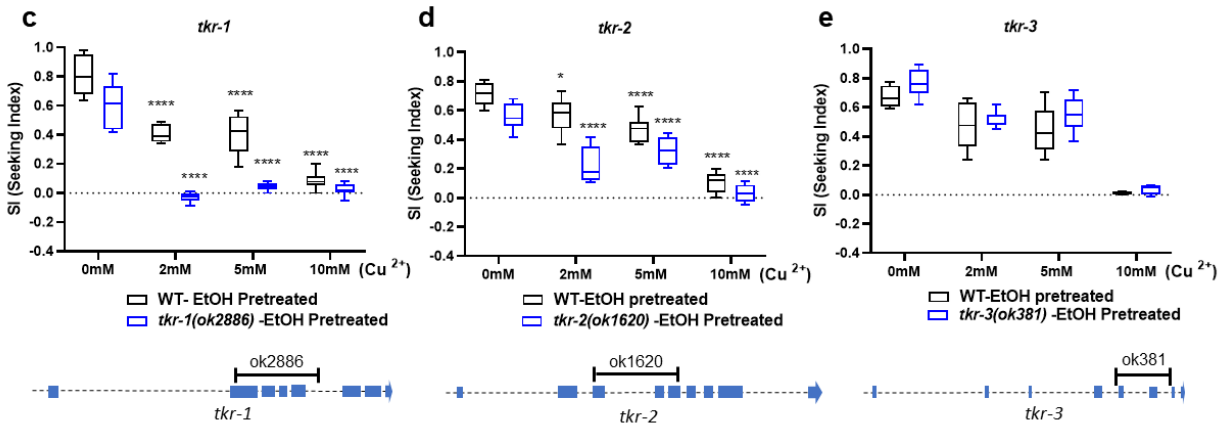

4

5

6

7

8

9
